# Supplementary material for: Dysbiosis and Variation in Predicted Functions of the Granulation Tissue Microbiome in HPV Positive and Negative Severe Chronic Periodontitis
Source: Hindawi journal article supplement (doi:10.1155/2019/8163591), 2019-04-14
Supplement: f1 [file 8163591.f1.pdf]

**Supplementary Table 1:** Selection of CP Patients and their status related to Human Papiloma Virus (HPV+/HPV-) used in present study.

|      | Age | Sex | HPV status |
|------|-----|-----|------------|
| CP1  | 26  | F   | positive   |
| CP2  | 22  | M   | negative   |
| CP3  | 30  | F   | negative   |
| CP4  | 22  | F   | negative   |
| CP5  | 26  | F   | positive   |
| CP6  | 50  | F   | negative   |
| CP7  | 60  | M   | negative   |
| CP8  | 60  | F   | negative   |
| CP9  | 50  | M   | negative   |
| CP10 | 37  | M   | negative   |
| CP11 | 39  | M   | negative   |
| CP12 | 34  | M   | negative   |
| CP13 | 39  | M   | negative   |
| CP14 | 22  | F   | negative   |
| CP15 | 55  | F   | positive   |
| CP16 | 44  | F   | negative   |
| CP17 | 37  | M   | negative   |
| CP18 | 40  | F   | negative   |
| CP19 | 32  | F   | positive   |
| CP20 | 66  | F   | negative   |
| CP21 | 33  | F   | positive   |
| CP22 | 18  | F   | negative   |
| CP23 | 40  | F   | negative   |
| CP24 | 39  | F   | positive   |
| CP25 | 38  | F   | negative   |
| CP26 | 48  | M   | positive   |
| CP27 | 40  | F   | negative   |
| CP28 | 30  | M   | negative   |
| CP29 | 48  | F   | negative   |
| CP30 | 36  | M   | negative   |
| CP31 | 42  | M   | negative   |
| CP32 | 32  | M   | negative   |
| CP33 | 31  | M   | negative   |
| CP34 | 30  | F   | negative   |
| CP35 | 27  | M   | negative   |
| CP36 | 42  | M   | negative   |
| CP37 | 29  | M   | negative   |

|      |    |   |          |
|------|----|---|----------|
| CP38 | 49 | M | negative |
| CP39 | 30 | F | negative |
| CP40 | 35 | F | negative |

**Supplementary Table 2:** Multiplexing with PacBio Barcoded Universal Primers in CP samples

| <b>S. No</b> | <b>Sample Name</b> | <b>Barcoded Primers Pair Used (Forward and Reverse Primers)</b> | <b>Pooling of Barcoded Samples and Library preparation</b> |
|--------------|--------------------|-----------------------------------------------------------------|------------------------------------------------------------|
| 1            | CP-1               | F-R                                                             | Library 1                                                  |
| 2            | CP-2               | F1-R1                                                           | Library 2                                                  |
| 3            | CP-3               | F2-R1                                                           | Library 3                                                  |
| 4            | CP-4               | F2-R2                                                           |                                                            |
| 5            | CP-6               | F2-R3                                                           |                                                            |
| 6            | CP-7               | F2-R4                                                           |                                                            |
| 7            | CP-8               | F3-R1                                                           | Library 4                                                  |
| 8            | CP-9               | F3-R2                                                           |                                                            |
| 9            | CP-10              | F3-R3                                                           |                                                            |
| 10           | CP-11              | F3-R4                                                           |                                                            |
| 11           | CP-13              | F4-R1                                                           | Library 5                                                  |
| 12           | CP-14              | F4-R2                                                           |                                                            |
| 13           | CP-15              | F4-R3                                                           |                                                            |
| 14           | CP-16              | F4-R4                                                           |                                                            |
| 15           | CP-18              | F1-R1                                                           | Library 6                                                  |
| 16           | CP-12              | F3-R4                                                           |                                                            |
| 17           | CP-5               | F4-R3                                                           |                                                            |
| 18           | CP-19              | F1-R2                                                           |                                                            |
| 19           | CP-20              | F1-R3                                                           |                                                            |
| 20           | CP-17              | F1-R3                                                           | Library 7                                                  |
| 21           | CP-21              | F1-R1                                                           |                                                            |
| 22           | CP-22              | F2-R1                                                           |                                                            |
| 23           | CP-23              | F3-R1                                                           |                                                            |
| 24           | CP-24              | F4-R1                                                           |                                                            |
| 25           | CP-25              | F1-R2                                                           |                                                            |
| 26           | CP-26              | F2-R3                                                           |                                                            |
| 27           | CP-27              | F3-R3                                                           |                                                            |
| 28           | CP-28              | F1-R1                                                           | Library 8                                                  |
| 29           | CP-29              | F1-R2                                                           |                                                            |
| 30           | CP-30              | F1-R3                                                           |                                                            |
| 31           | CP-31              | F1-R4                                                           |                                                            |
| 32           | CP-32              | F2-R1                                                           |                                                            |
| 33           | CP-33              | F2-R2                                                           |                                                            |
| 34           | CP-34              | F2-R3                                                           |                                                            |

|    |       |       |  |
|----|-------|-------|--|
| 35 | CP-35 | F2-R4 |  |
| 36 | CP-36 | F3-R1 |  |
| 37 | CP-37 | F3-R2 |  |
| 38 | CP-38 | F3-R3 |  |
| 39 | CP-39 | F3-R4 |  |
| 40 | CP-40 | F4-R1 |  |

**Supplementary Table 3:** The number of processed full-length 16S rRNA sequences per CP samples ranged from 672 to 28,780 with an average of 7,357 reads/sample.

| Sample Name | Number of Raw CCS Reads | Number of CCS Reads after filtering |
|-------------|-------------------------|-------------------------------------|
| CP1         | 9475                    | 4192                                |
| CP2         | 6556                    | 3736                                |
| CP3         | 16309                   | 10405                               |
| CP4         | 9724                    | 5731                                |
| CP5         | 37158                   | 28780                               |
| CP6         | 12727                   | 7802                                |
| CP7         | 18378                   | 11864                               |
| CP8         | 7825                    | 6007                                |
| CP9         | 7613                    | 5792                                |
| CP10        | 11478                   | 8858                                |
| CP11        | 11737                   | 8586                                |
| CP12        | 25108                   | 20363                               |
| CP13        | 15397                   | 13282                               |
| CP14        | 8138                    | 6149                                |
| CP15        | 10887                   | 8885                                |
| CP16        | 11549                   | 9311                                |
| CP17        | 10286                   | 7811                                |
| CP18        | 6707                    | 5403                                |
| CP19        | 9406                    | 7515                                |
| CP20        | 5860                    | 4690                                |
| CP21        | 14434                   | 11687                               |
| CP22        | 6391                    | 4693                                |
| CP23        | 9393                    | 7172                                |
| CP24        | 11301                   | 8993                                |
| CP26        | 7533                    | 5573                                |

|                     |         |         |
|---------------------|---------|---------|
| CP27                | 9707    | 7193    |
| CP30                | 3457    | 3148    |
| CP31                | 772     | 672     |
| CP32                | 5528    | 5172    |
| CP33                | 1913    | 1652    |
| CP34                | 4241    | 3544    |
| CP35                | 6622    | 4767    |
| CP36                | 6391    | 5701    |
| CP37                | 3306    | 2928    |
| CP38                | 4925    | 4399    |
| CP39                | 4941    | 4119    |
| CP40                | 6123    | 5646    |
| Total Reads         | 359296  | 272774  |
| Average No of Reads | 9710.70 | 7357.32 |
| $\pm$ SD            | 6656.78 | 5117.64 |

**Supplementary Table 5a:** Alpha diversity values of shannon index for individual CP samples

| <b>Group</b> | <b>Shannon</b> | <b>Shannon_Ici</b> | <b>Shannon_hci</b> |
|--------------|----------------|--------------------|--------------------|
| CP1          | 6.866257       | 6.810809           | 6.921705           |
| CP10         | 7.614023       | 7.578461           | 7.649585           |
| CP11         | 7.292934       | 7.252411           | 7.333456           |
| CP12         | 7.996757       | 7.967874           | 8.025639           |
| CP13         | 7.557078       | 7.498929           | 7.615228           |
| CP14         | 7.246837       | 7.194382           | 7.299292           |
| CP15         | 7.708749       | 7.671141           | 7.746356           |
| CP16         | 7.778777       | 7.738416           | 7.819138           |
| CP17         | 7.486967       | 7.44582            | 7.528114           |
| CP18         | 7.244874       | 7.204657           | 7.285091           |
| CP19         | 7.604914       | 7.572032           | 7.637797           |
| CP2          | 6.740064       | 6.692445           | 6.787683           |
| CP20         | 7.077464       | 7.037181           | 7.117747           |
| CP21         | 7.510457       | 7.456783           | 7.564131           |
| CP22         | 7.005247       | 6.953505           | 7.056988           |
| CP23         | 7.217533       | 7.17357            | 7.261496           |
| CP24         | 7.600276       | 7.5583             | 7.642252           |
| CP26         | 7.079197       | 7.027381           | 7.131013           |
| CP27         | 7.38128        | 7.331073           | 7.431487           |
| CP3          | 7.707934       | 7.666318           | 7.74955            |
| CP30         | 6.8497         | 6.801366           | 6.898034           |
| CP31         | 5.60211        | 5.517967           | 5.686252           |
| CP32         | 6.105019       | 5.995159           | 6.21488            |
| CP33         | 5.974474       | 5.901364           | 6.047585           |
| CP34         | 6.665454       | 6.604803           | 6.726104           |
| CP35         | 5.514053       | 5.420546           | 5.607561           |
| CP36         | 6.901879       | 6.852621           | 6.951137           |
| CP 37        | 6.587557       | 6.534557           | 6.640557           |
| CP38         | 6.967821       | 6.921932           | 7.013711           |
| CP39         | 6.992089       | 6.942125           | 7.042052           |
| CP4          | 7.102627       | 7.047715           | 7.157538           |
| CP40         | 6.785265       | 6.728457           | 6.842072           |
| CP5          | 8.058471       | 8.017507           | 8.099434           |
| CP6          | 7.799119       | 7.764647           | 7.833591           |
| CP7          | 7.628564       | 7.596682           | 7.660446           |
| CP8          | 7.111301       | 7.054793           | 7.16781            |
| CP9          | 6.787735       | 6.730904           | 6.844566           |

**Supplementary Table 5b:** Alpha diversity analysis tests ANNOVA (Repeated Measures ANNOVA) equal means

|                  | Sum of sqrs            | df  | Mean square            | F      | p (same)      |
|------------------|------------------------|-----|------------------------|--------|---------------|
| Between groups   | 7.19713E <sup>09</sup> | 5   | 1.43943E <sup>09</sup> | 0.8979 | <b>0.4837</b> |
| Within groups    | -                      | 222 | 1.59909E <sup>09</sup> | -      | -             |
| Error            | -                      | 185 | 1.60316E <sup>09</sup> | -      | -             |
| Between subjects | -                      | 37  | 1.57878E <sup>09</sup> | -      | -             |
| Total            | -                      | 227 | -                      | -      | -             |



**Supplementary Table 5c:** Tukey's pairwise test showing no significant difference between sampled species in each sample.

| <b>nseqs</b>   | <b>coverage</b> | <b>sobs</b> | <b>invsimpson</b> | <b>invsimpson_lci</b> | <b>invsimpson_hci</b> |
|----------------|-----------------|-------------|-------------------|-----------------------|-----------------------|
| nseqs          | 0.9999          | 1           | 0.7584            | 0.999                 | 0.8509                |
| coverage       | 0.3461          | 0.9999      | 0.6038            | 0.9892                | 0.7176                |
| sobs           | 0.04313         | 0.303       | 0.7404            | 0.9985                | 0.8365                |
| invsimpson     | 1.906           | 2.252       | 1.949             | 0.9286                | 1                     |
| invsimpson_hci | 0.5389          | 0.885       | 0.582             | 1.367                 | 0.9694                |
| invsimpson_hci | 1.656           | 2.002       | 1.699             | 0.2498                | 1.117                 |

**Supplementary Table 6:** Different Indexes reporting Beta Diversity between HPV+ and HPV- CP dataset.

|               |         |
|---------------|---------|
| Whittaker:    | 2.1392  |
| Harrison:     | 0.30561 |
| Cody:         | 36.5    |
| Routledge:    | 0.32126 |
| Wilson-Shmida | 3.6962  |
| Mourelle:     | 0.52803 |
| Harrison 2:   | 0.10317 |
| Williams:     | 0.41935 |

**Supplementary Figure 1a:** Rarefaction Curves calculated at 3% dissimilarity, compare the number of reads with the number of operational taxonomic units (OTUs) found in the DNA from the 40 CP samples. The curves for individual samples which nearly plateaued off for the majority of the samples.

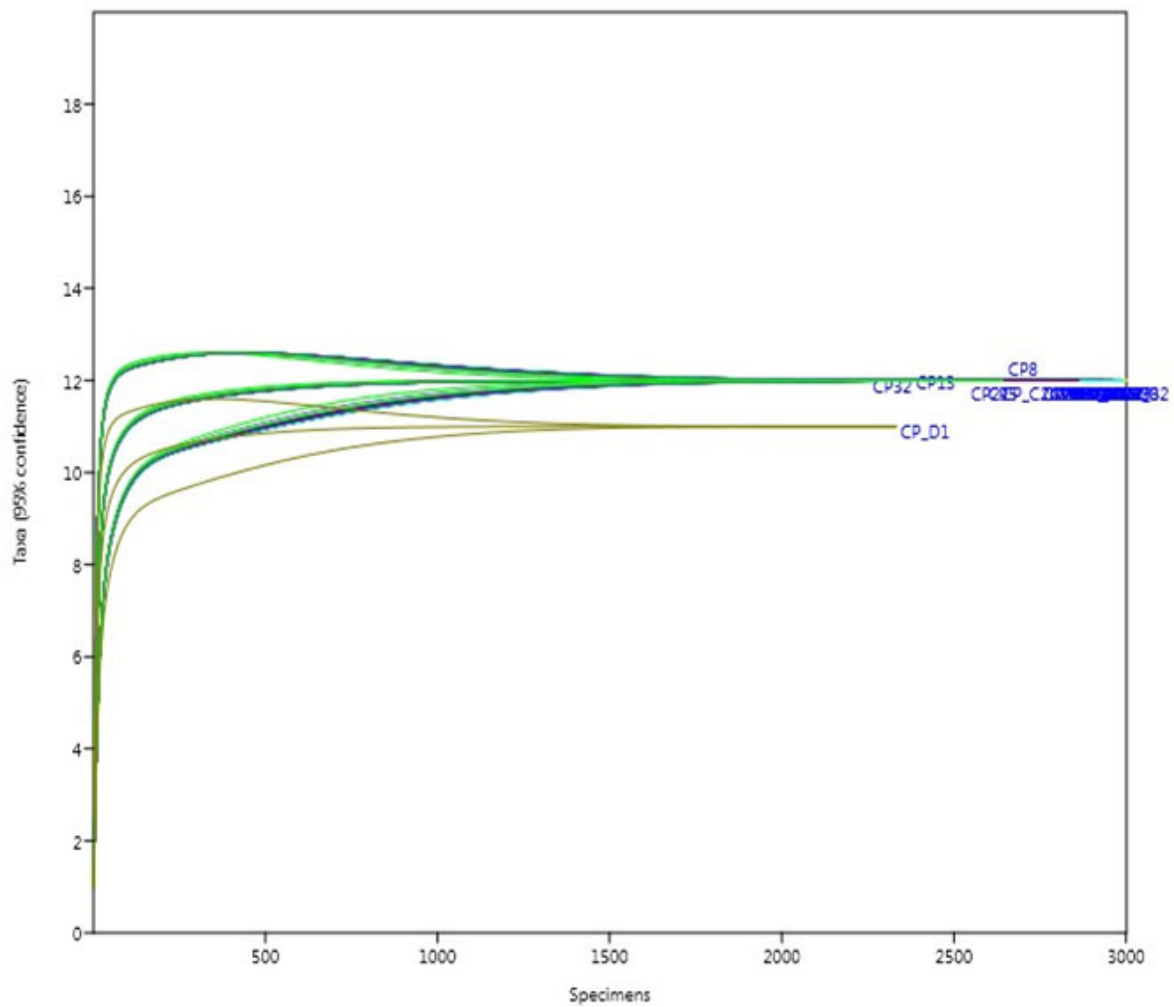

**Supplementary Figure 1b:** Sample rarefaction (Mao tau) curve of alpha diversity for species richness estimation ( $p < 0.05$ ) as a function of number of samples derived from Shanon index values of individual samples.

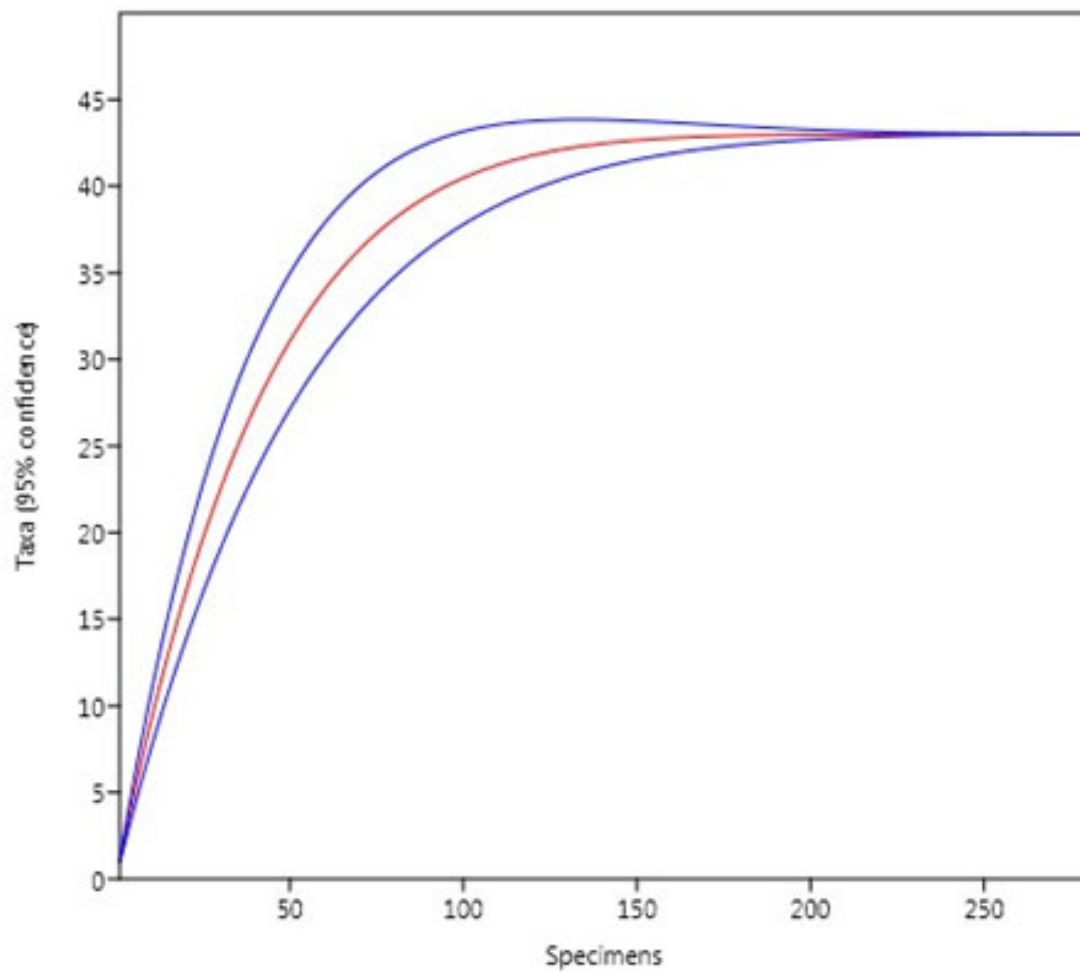

**Supplementary Figure 2a:** Diversity of bacterial phyla identified in granulations tissue of CP samples.

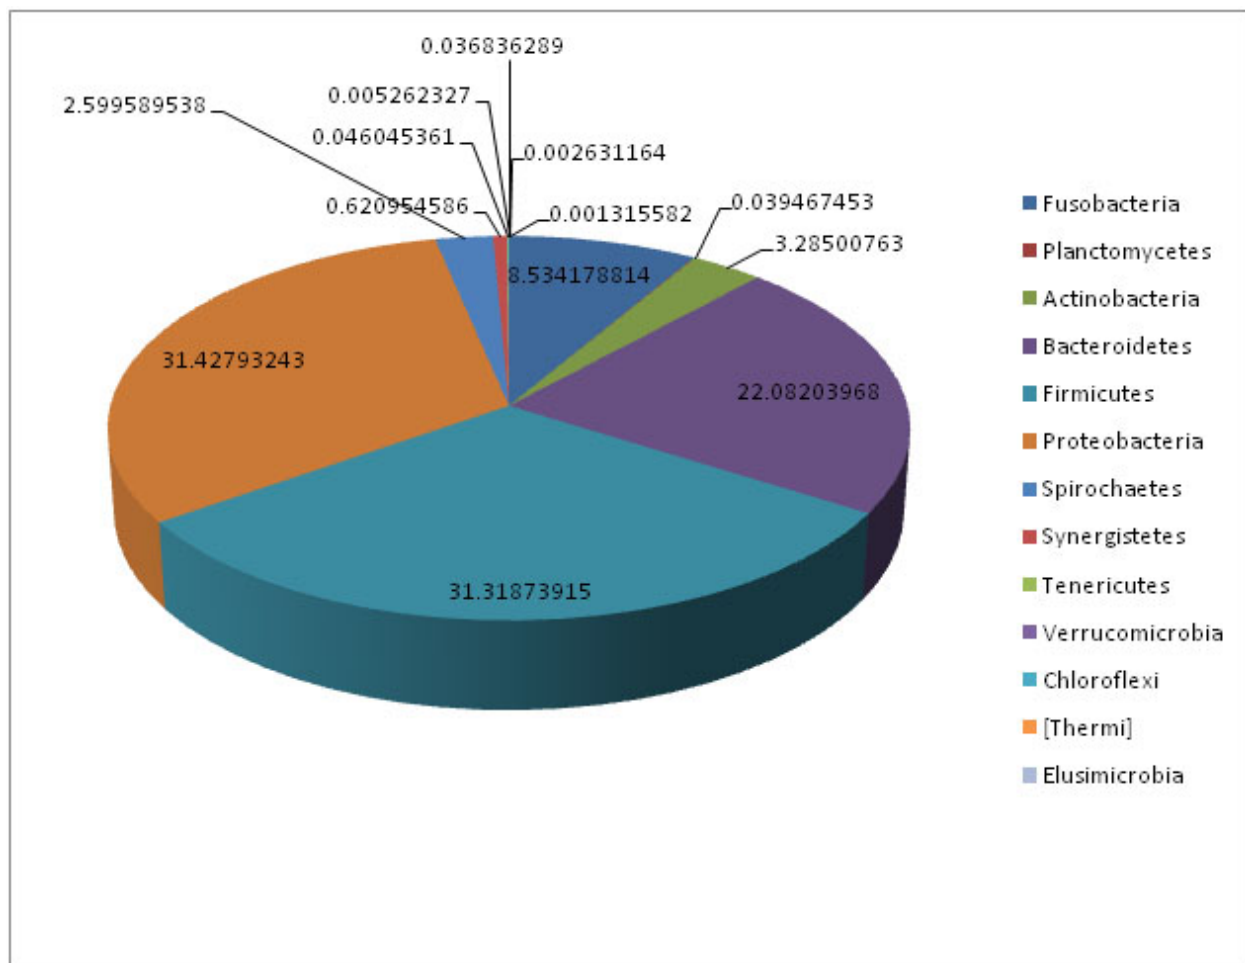

**Supplementary Figure 2b:** Diversity of bacterial species in CP samples identified in granulation tissue.

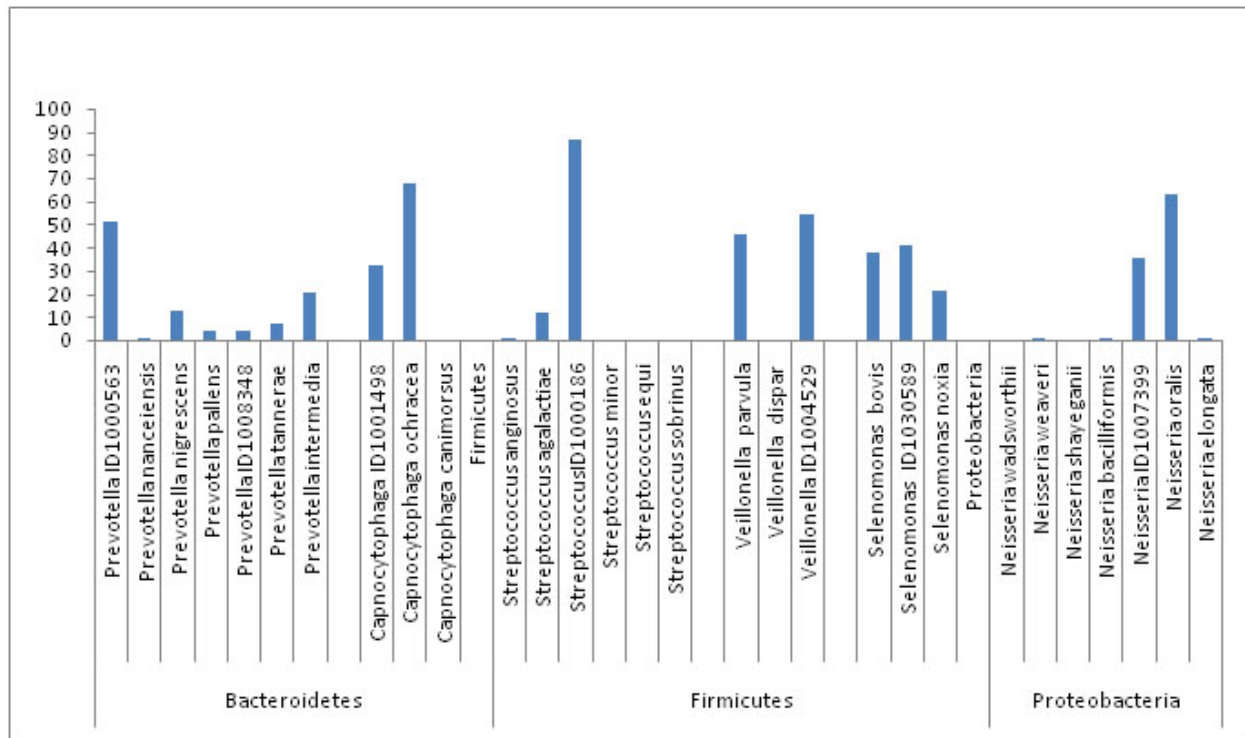

**Supplementary Figure 3a:** Scatter plot and correlation estimates of bacterial species abundance between HPV+ and HPV- samples in CP samples.

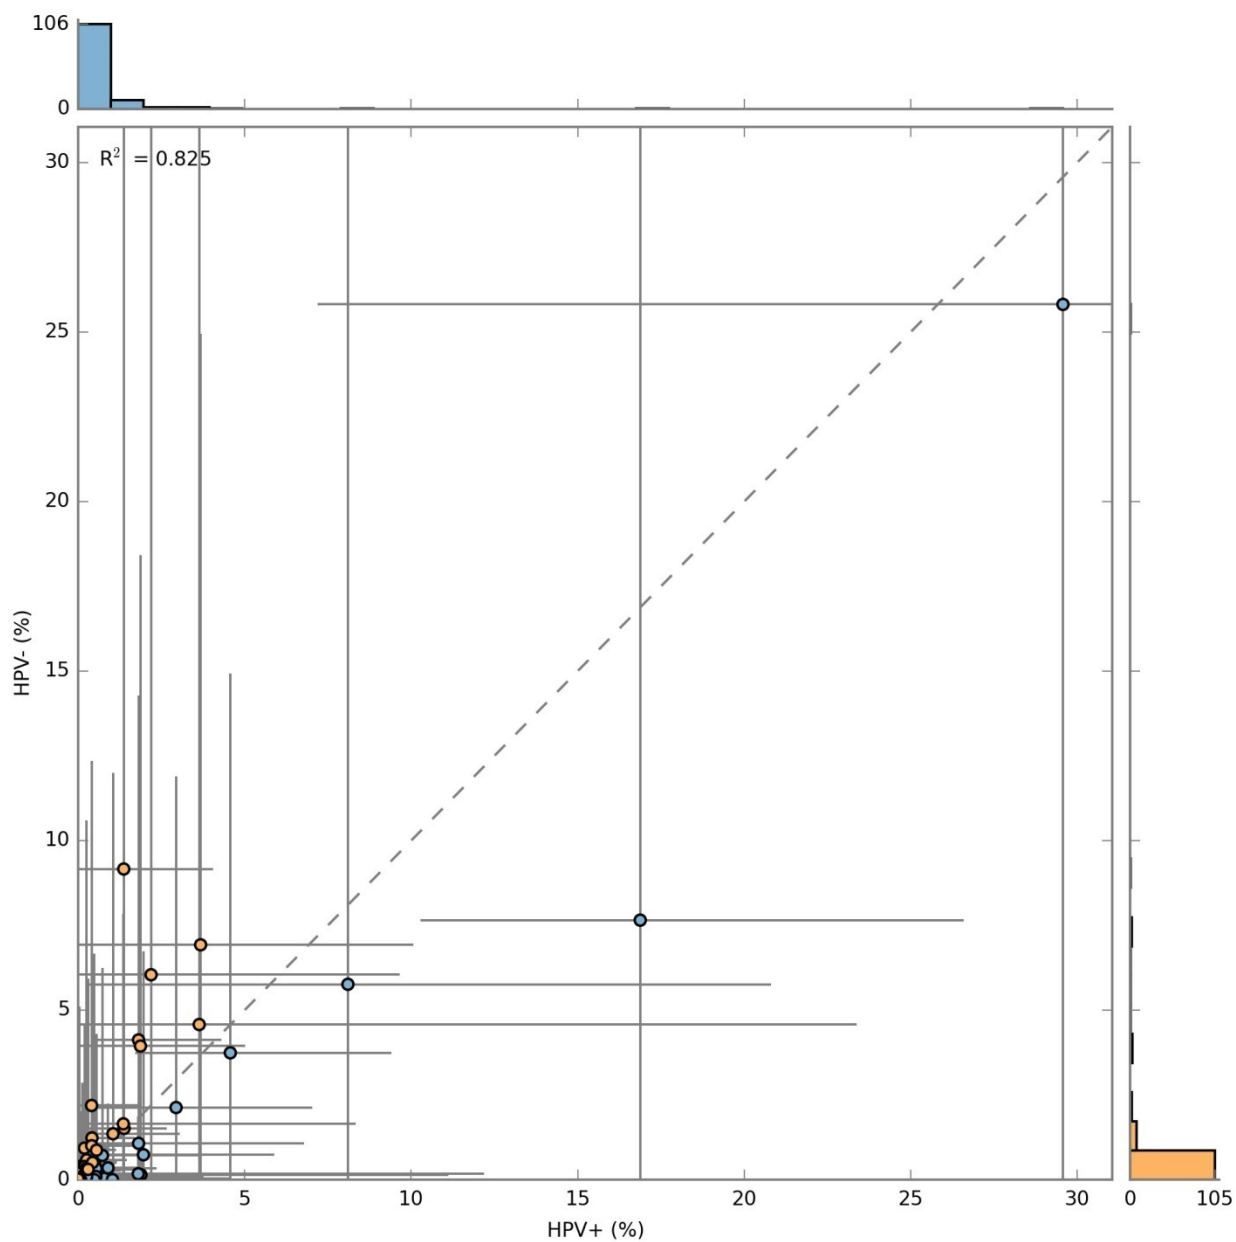

**Supplementary Figure 3b:** Beta diversity non-metric multidimensional scaling plot based on Theta YC two axis coordinate values obtained through mothur using Weighted UniFrac algorithm, showing distance or dissimilarity between each sample pair.

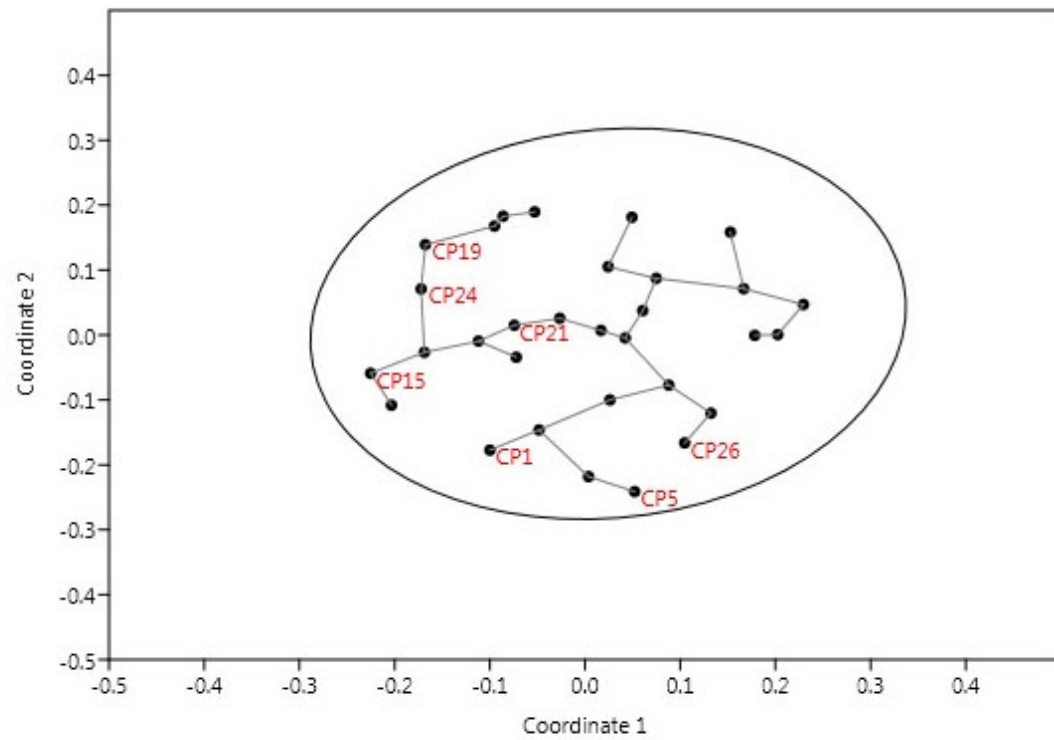



**Supplementary Figure 3c:** Principal coordinates analysis (PCoA) plot from ThetaYC values of beta diversity distance matrix. Where, coordinate 1 (X-axis) shows the maximum amount of variation present in the samples, with respect to coordinate 2 (Y-axis). Representation of OTU's between HPV+ and HPV - samples is randomly distributed.

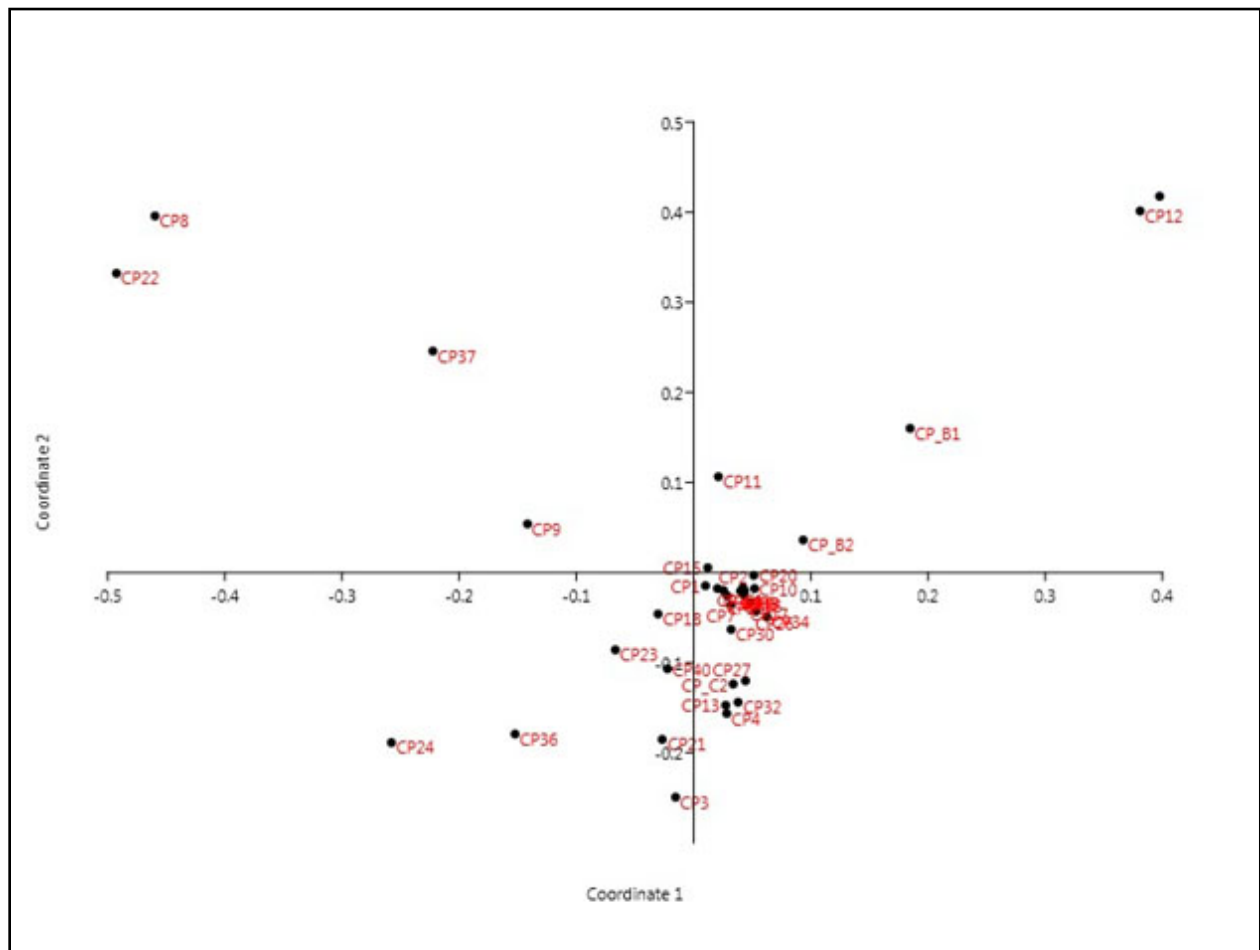

**Supplementary Figure 4:** Heat-map profile of abundance distribution of identified species in CP samples.

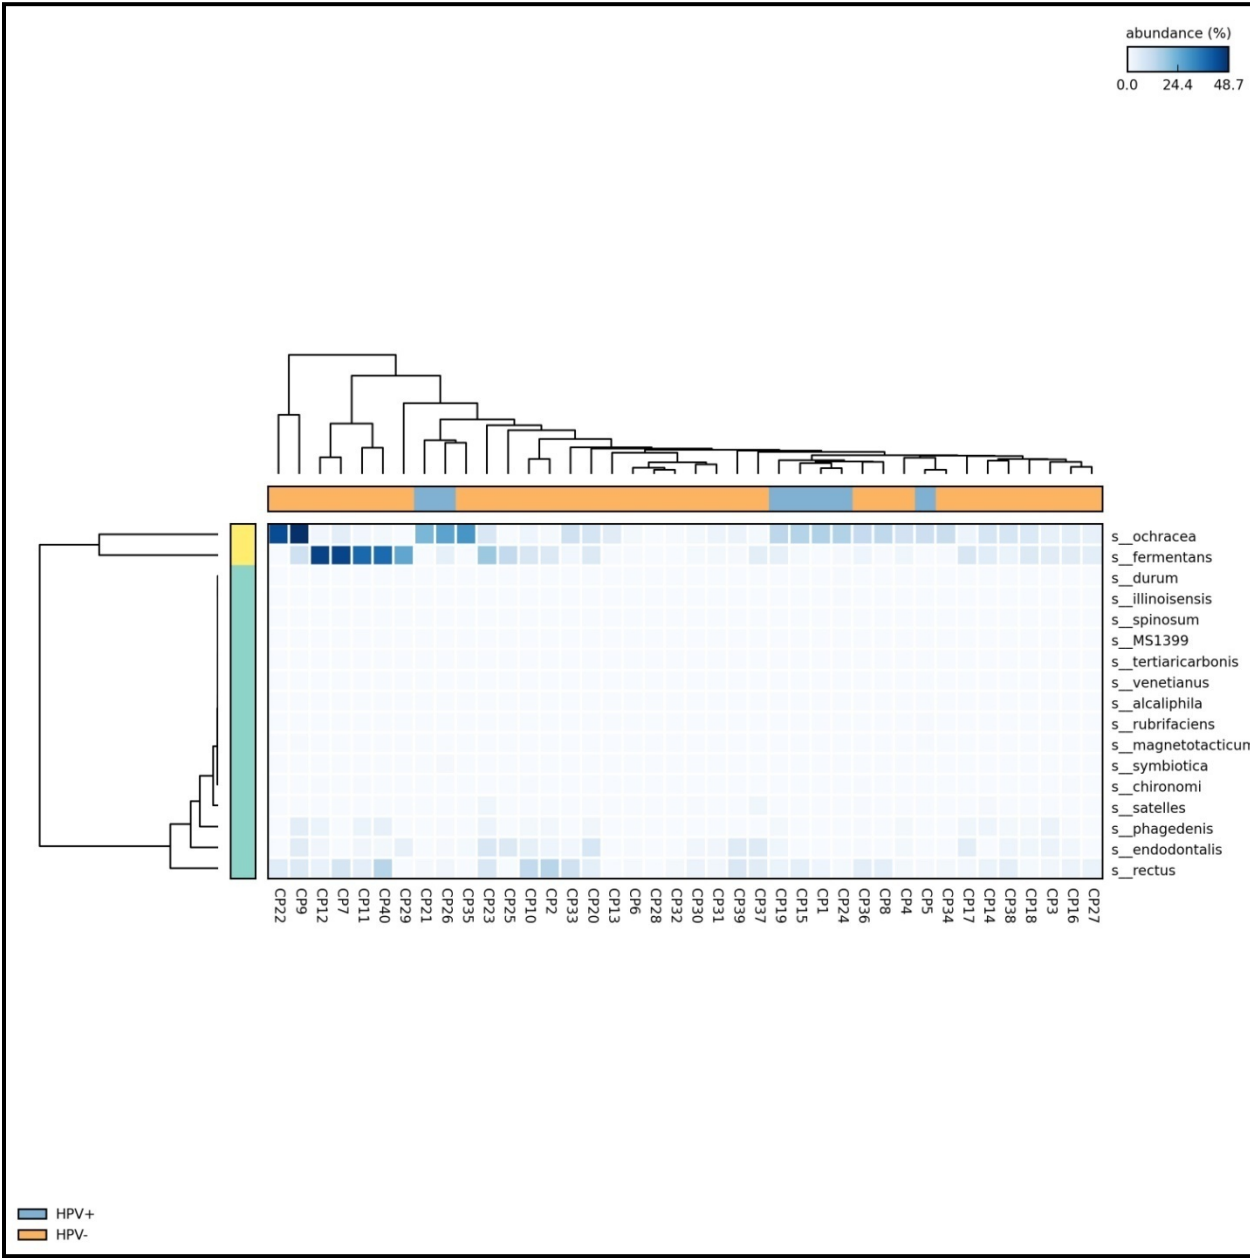

**Supplementary Figure 5a:** Scatter plot and correlation estimates of bacterial species functional predictions between HPV+ and HPV- samples in CP samples.

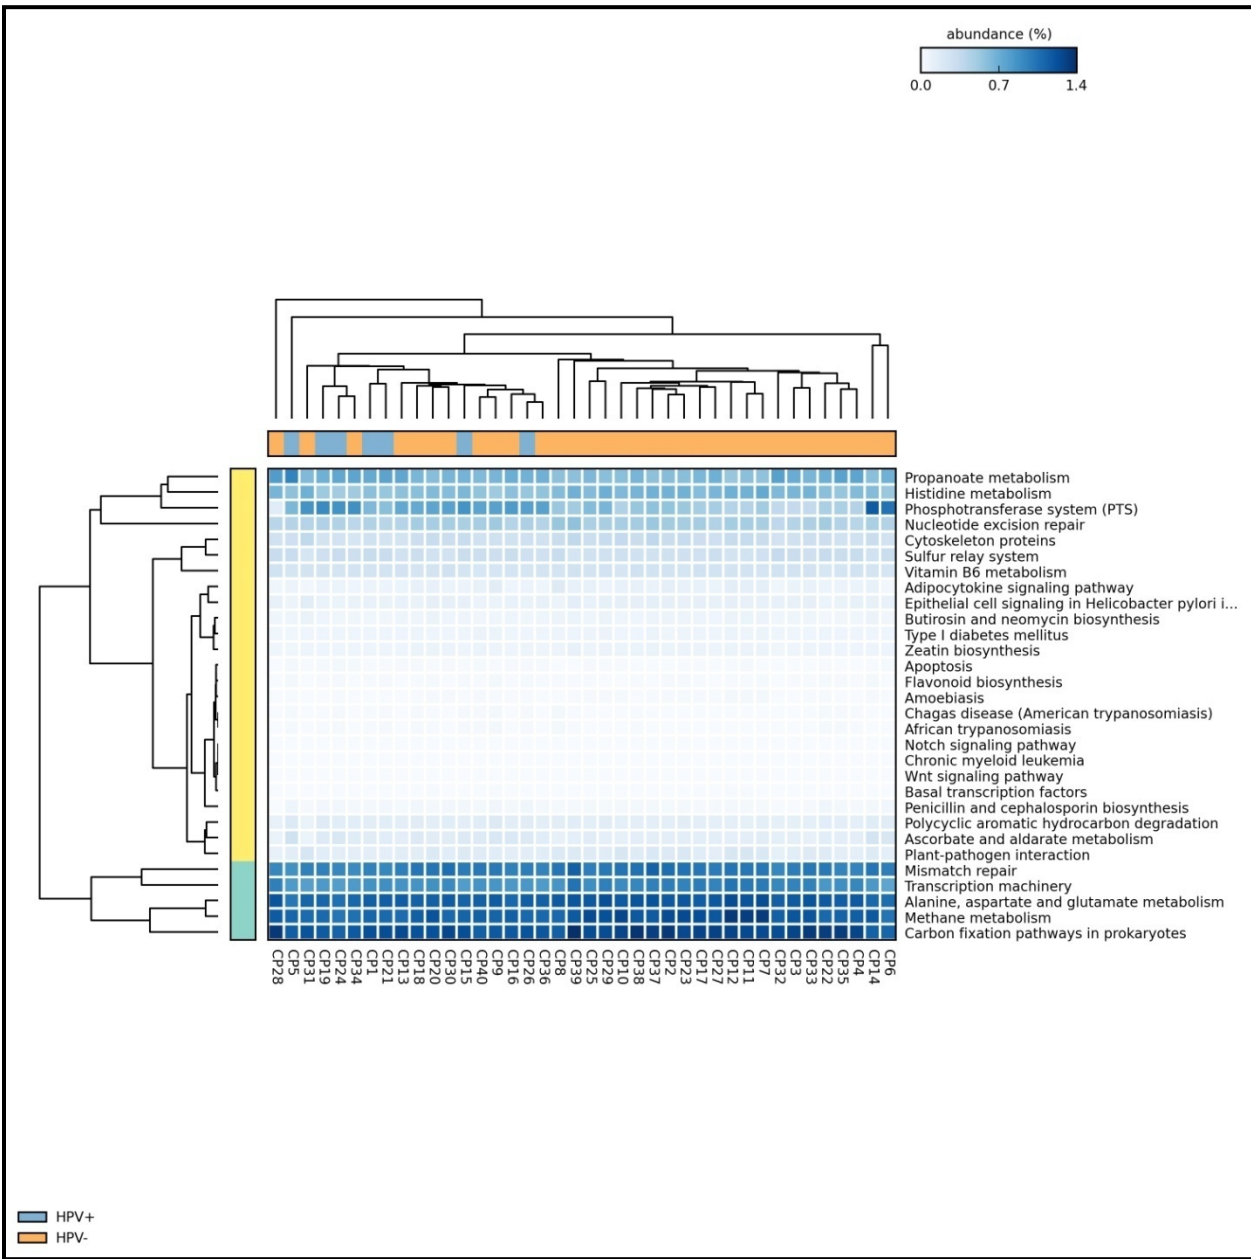

**Supplementary Figure 6a:** Scatter plot and correlation estimates of bacterial species abundance between Male and Female samples in CP samples.

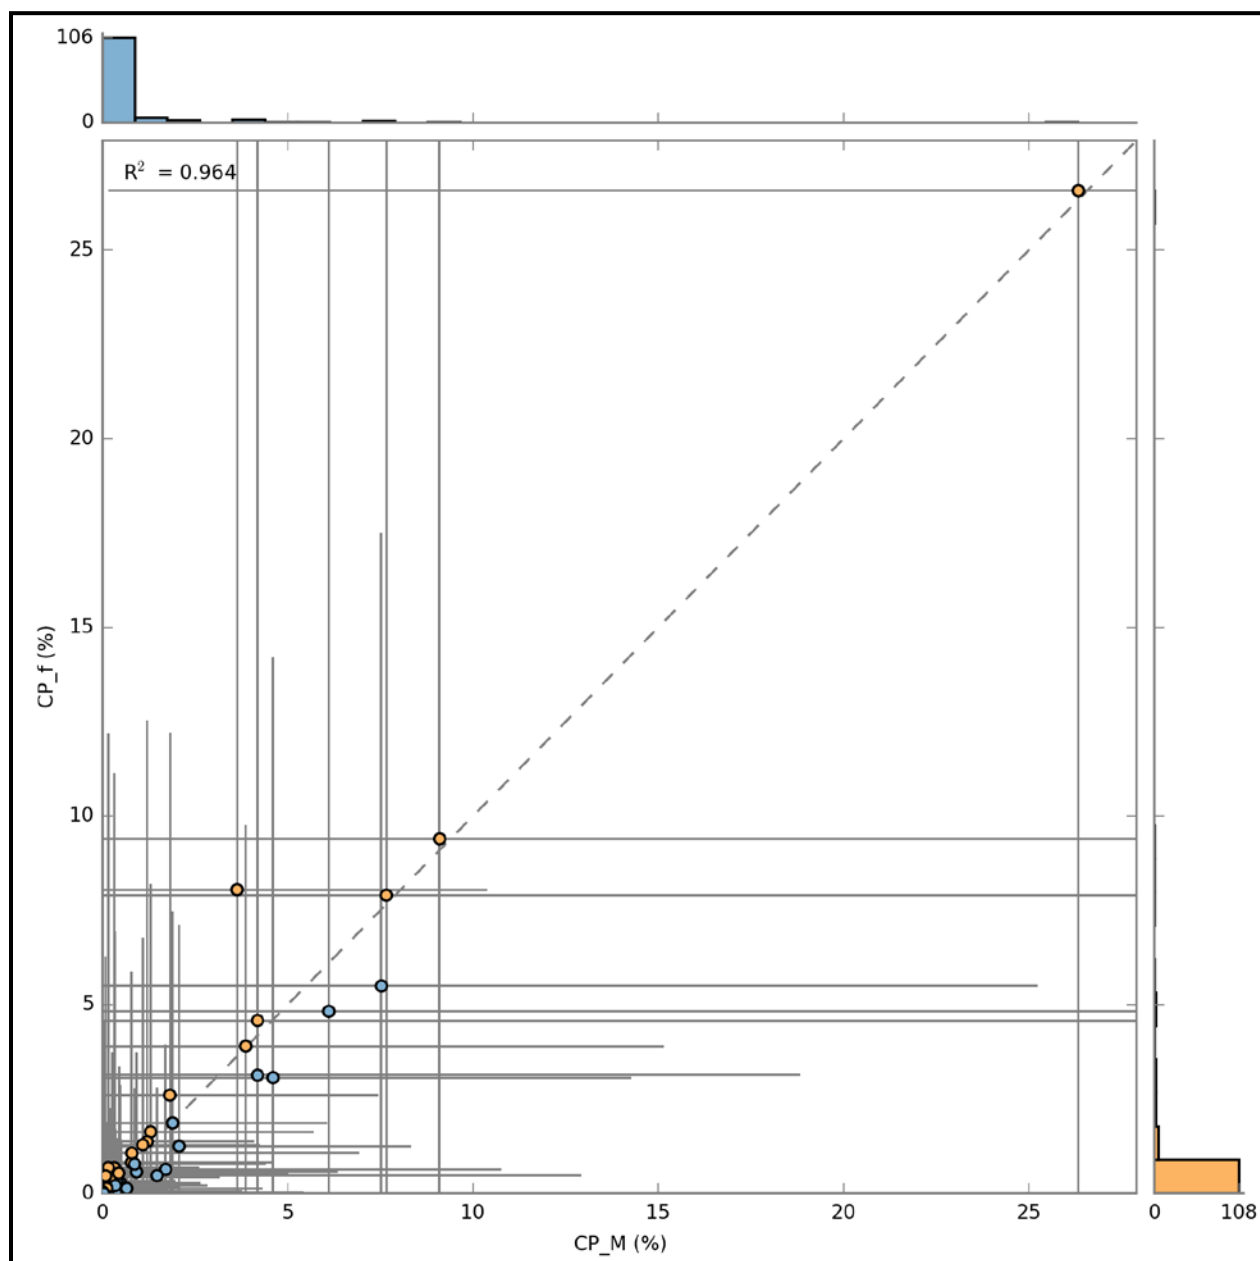

**Supplementary Figure 6b:** Heat-map profile of abundance distribution of identified species in Male and Female samples in CP samples.

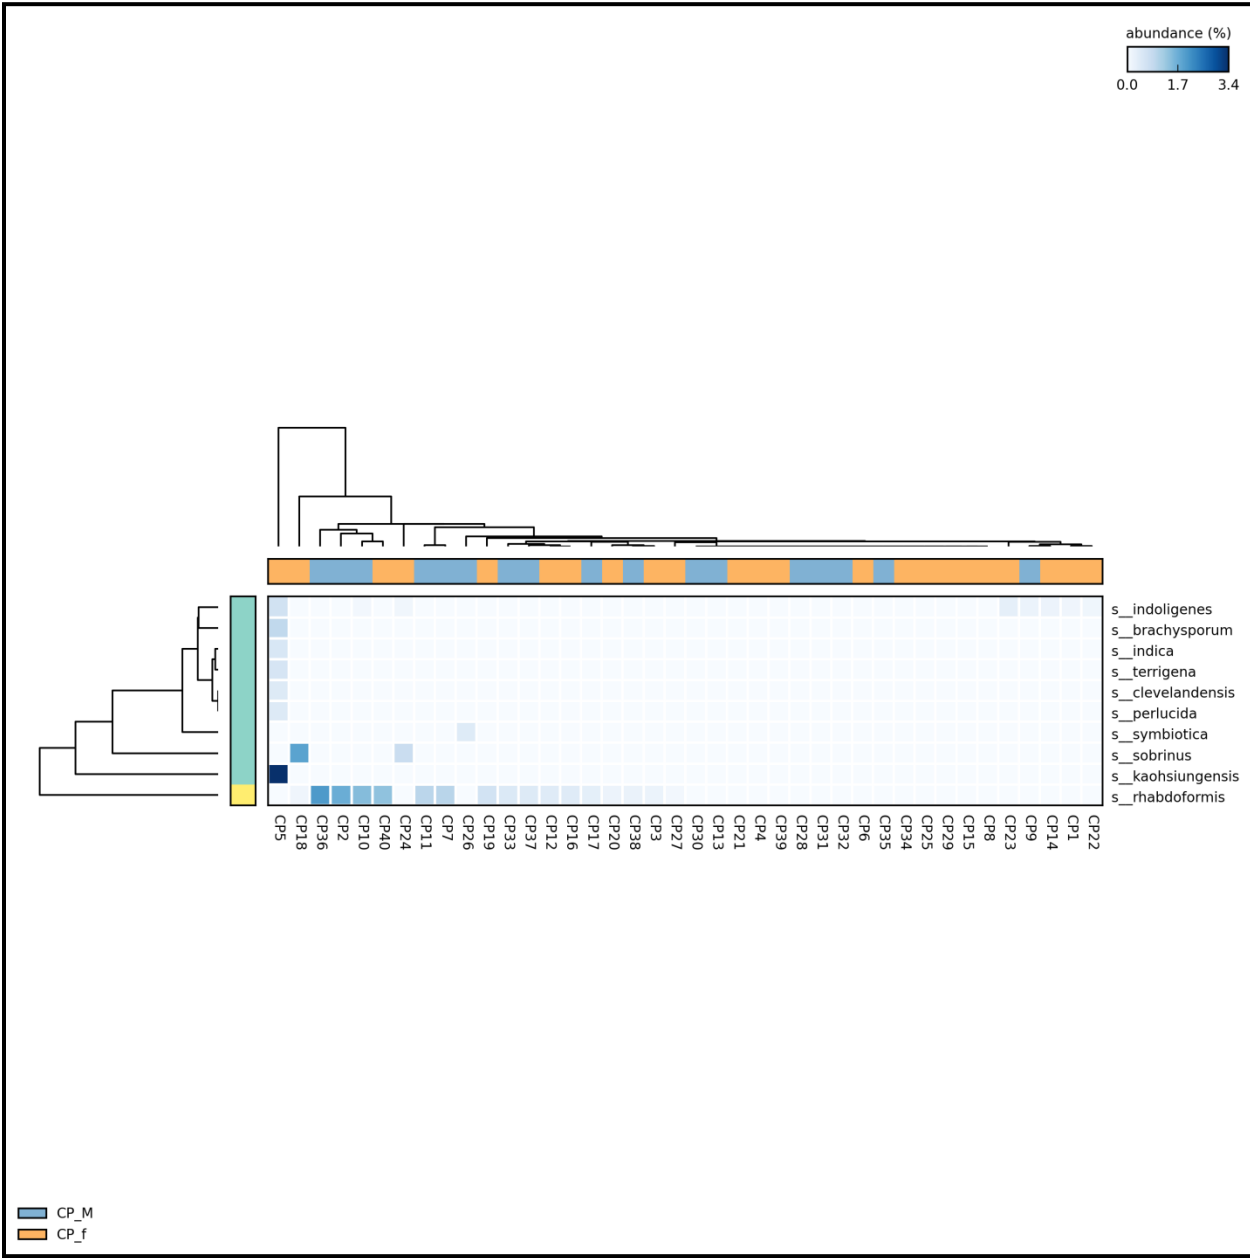

**Supplementary Figure 7a:** Heat-map profile of functional predictions of identified species in Male and Female samples in CP samples.

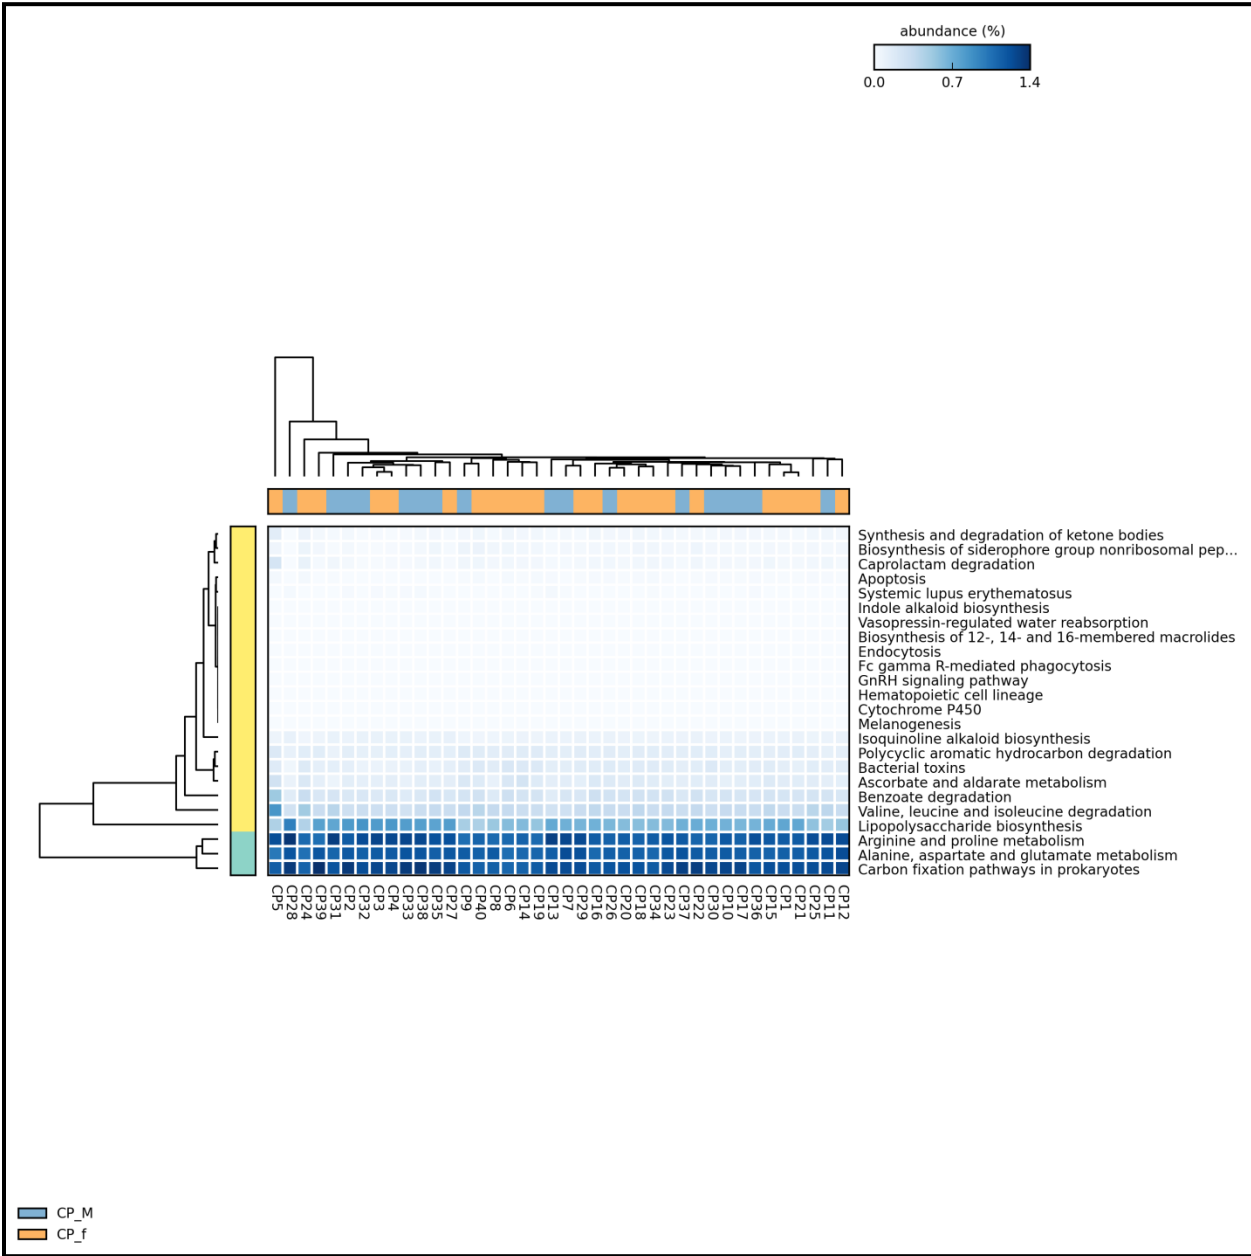

**Supplementary Figure 7b:** Mean proportion of bacterial species abundance between male and female CP samples. The significant difference observed between the two groups at 95% confidence level and  $p < 0.05$  are reported.

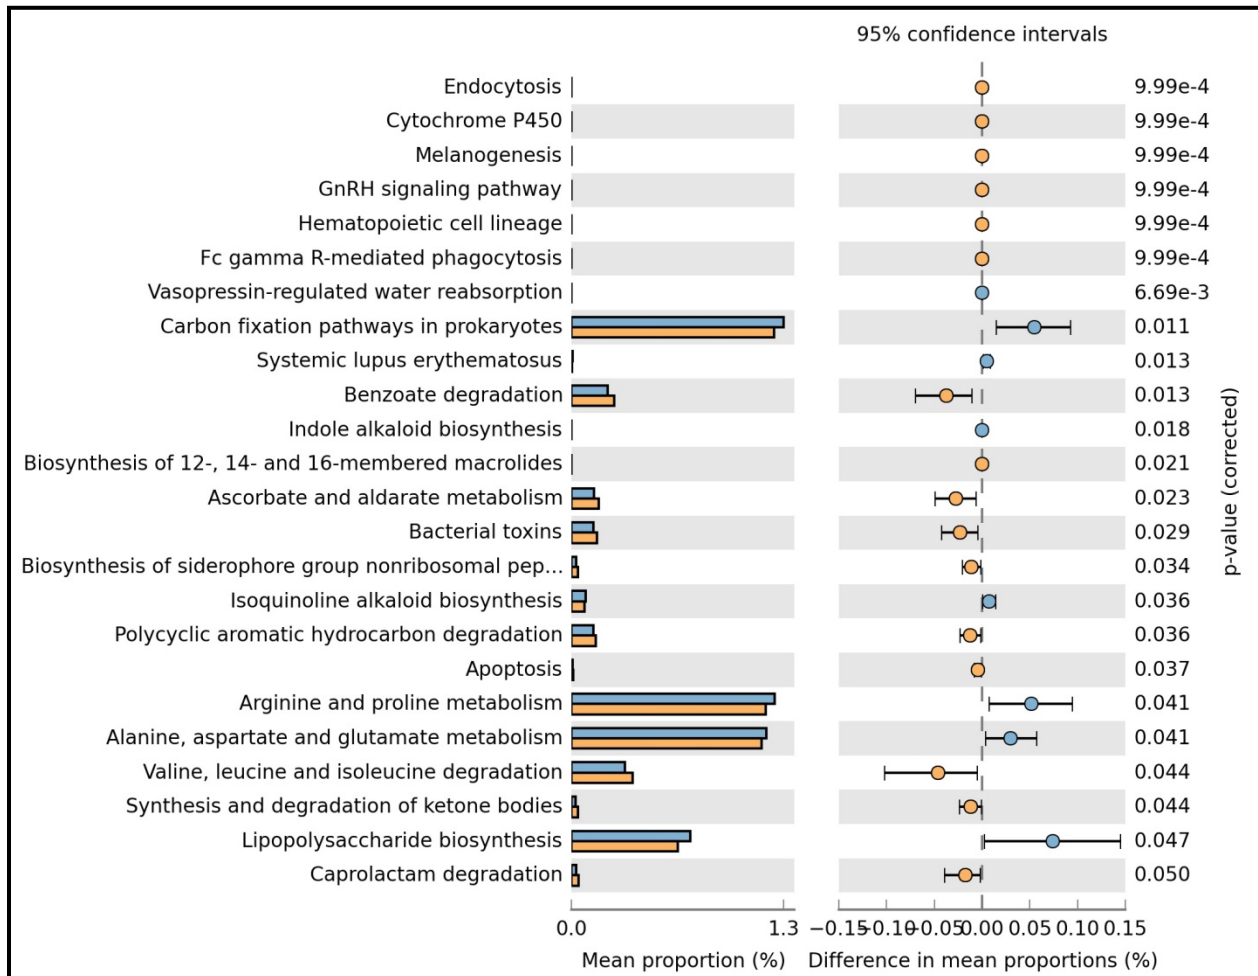

**Supplementary Figure 8a:** Scatter plot and correlation estimates of bacterial species abundance between Age above and below 40 samples in CP samples.

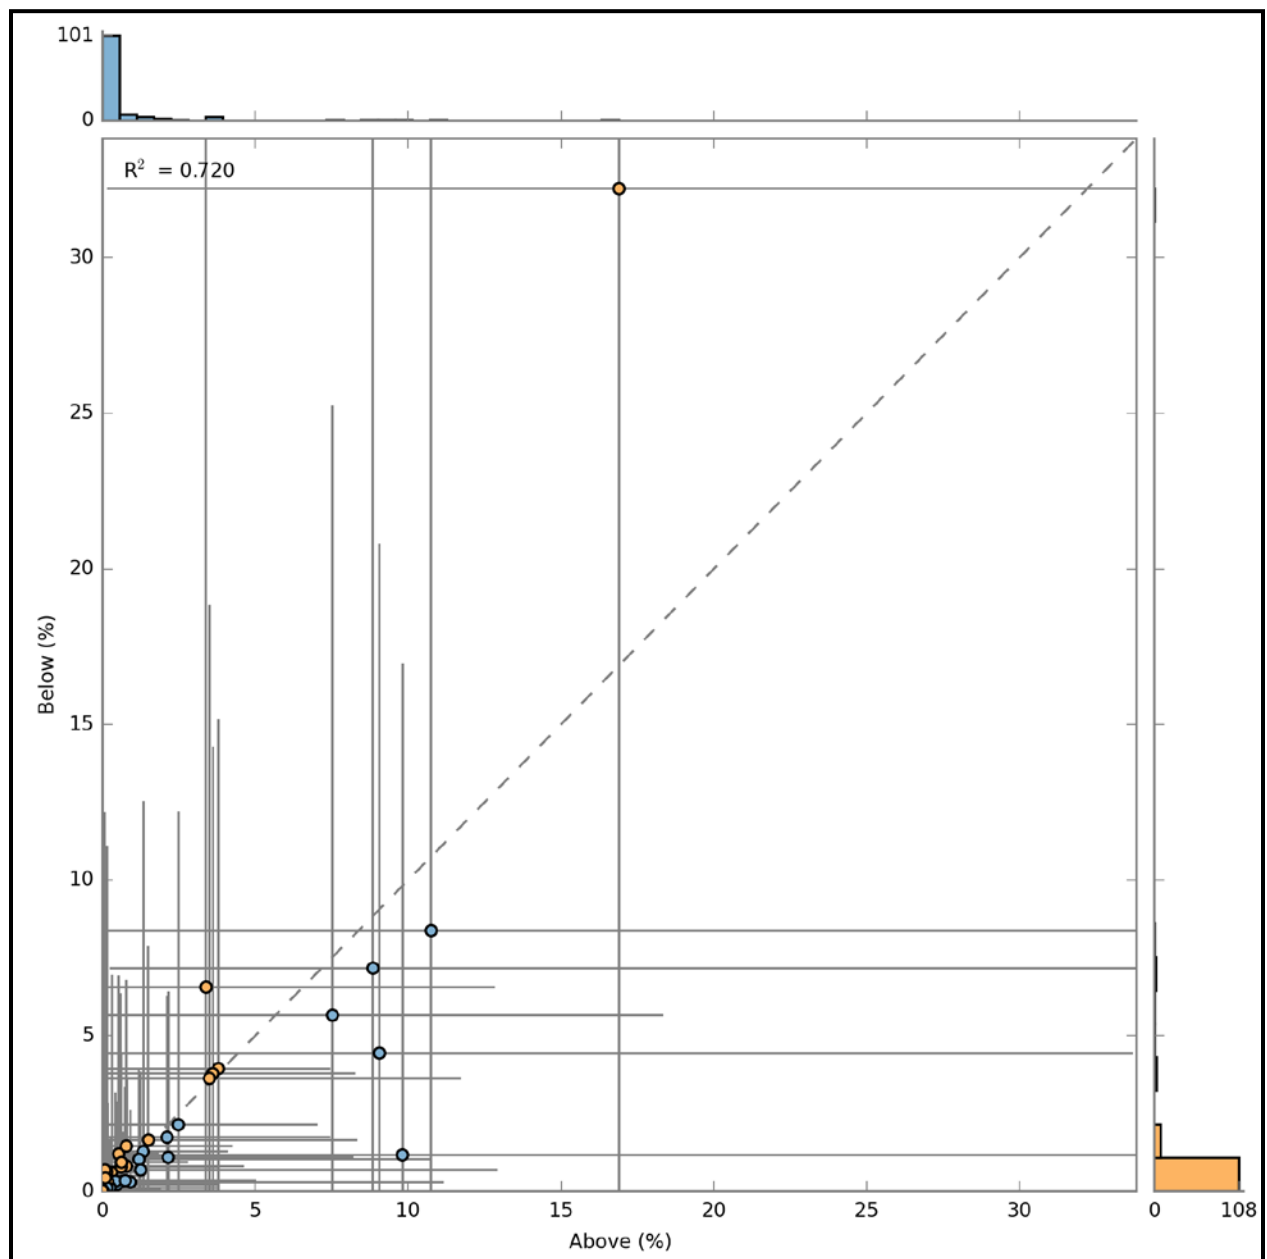



**Supplementary Figure 8b:** Heat-map profile of abundance distribution of identified species in Age above and below 40 samples in CP samples.

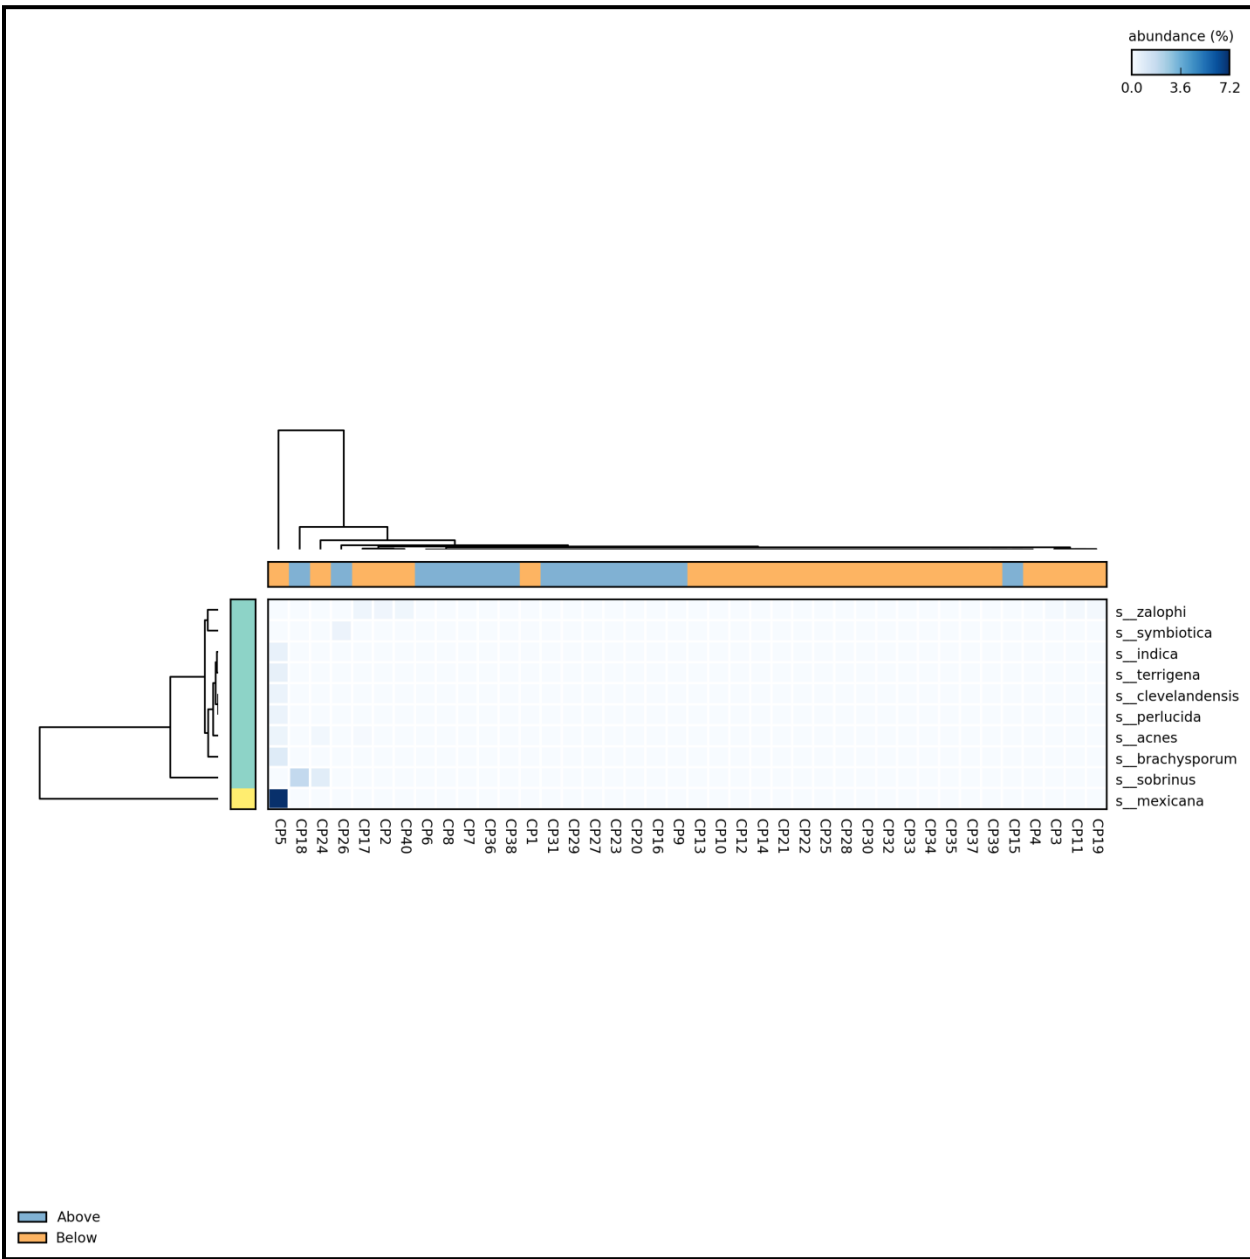

**Supplementary Figure 9a:** Heat-map profile of functional predictions of identified species in age above 40 (blue) and below 40 years (yellow) samples in CP samples.

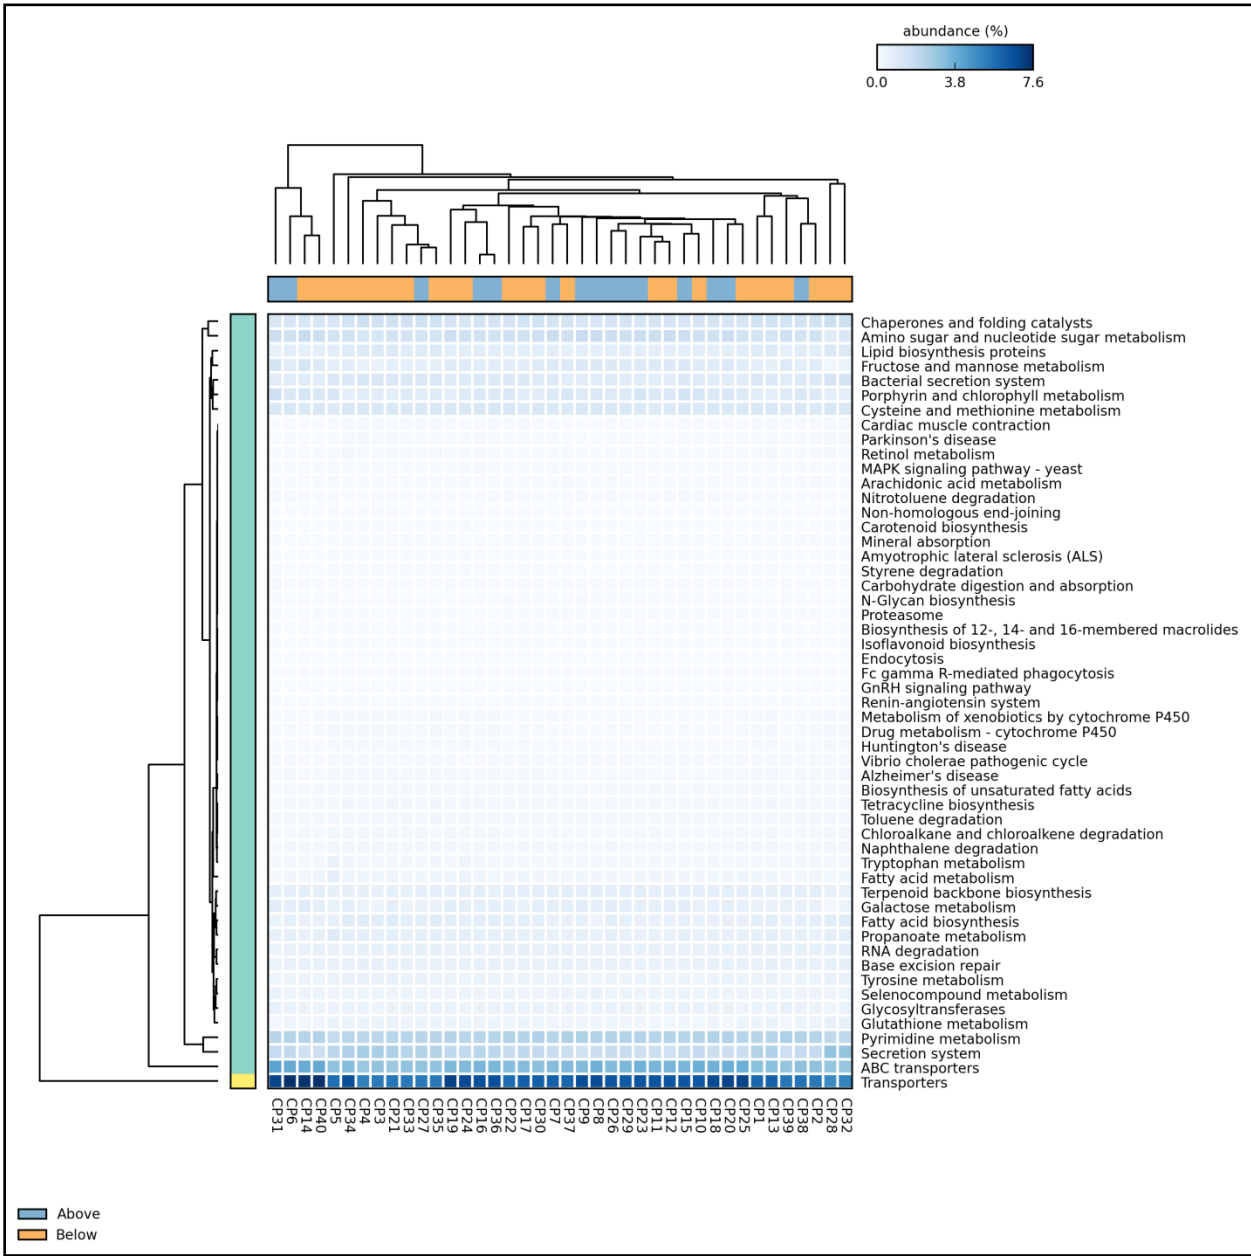

**Supplementary Figure 9b:** Mean proportion of bacterial species abundance between age above 40 (blue bar) and below 40 years (yellow bar) samples in CP samples. The significant difference observed between the two groups at 95% confidence level and  $p < 0.05$  are reported.

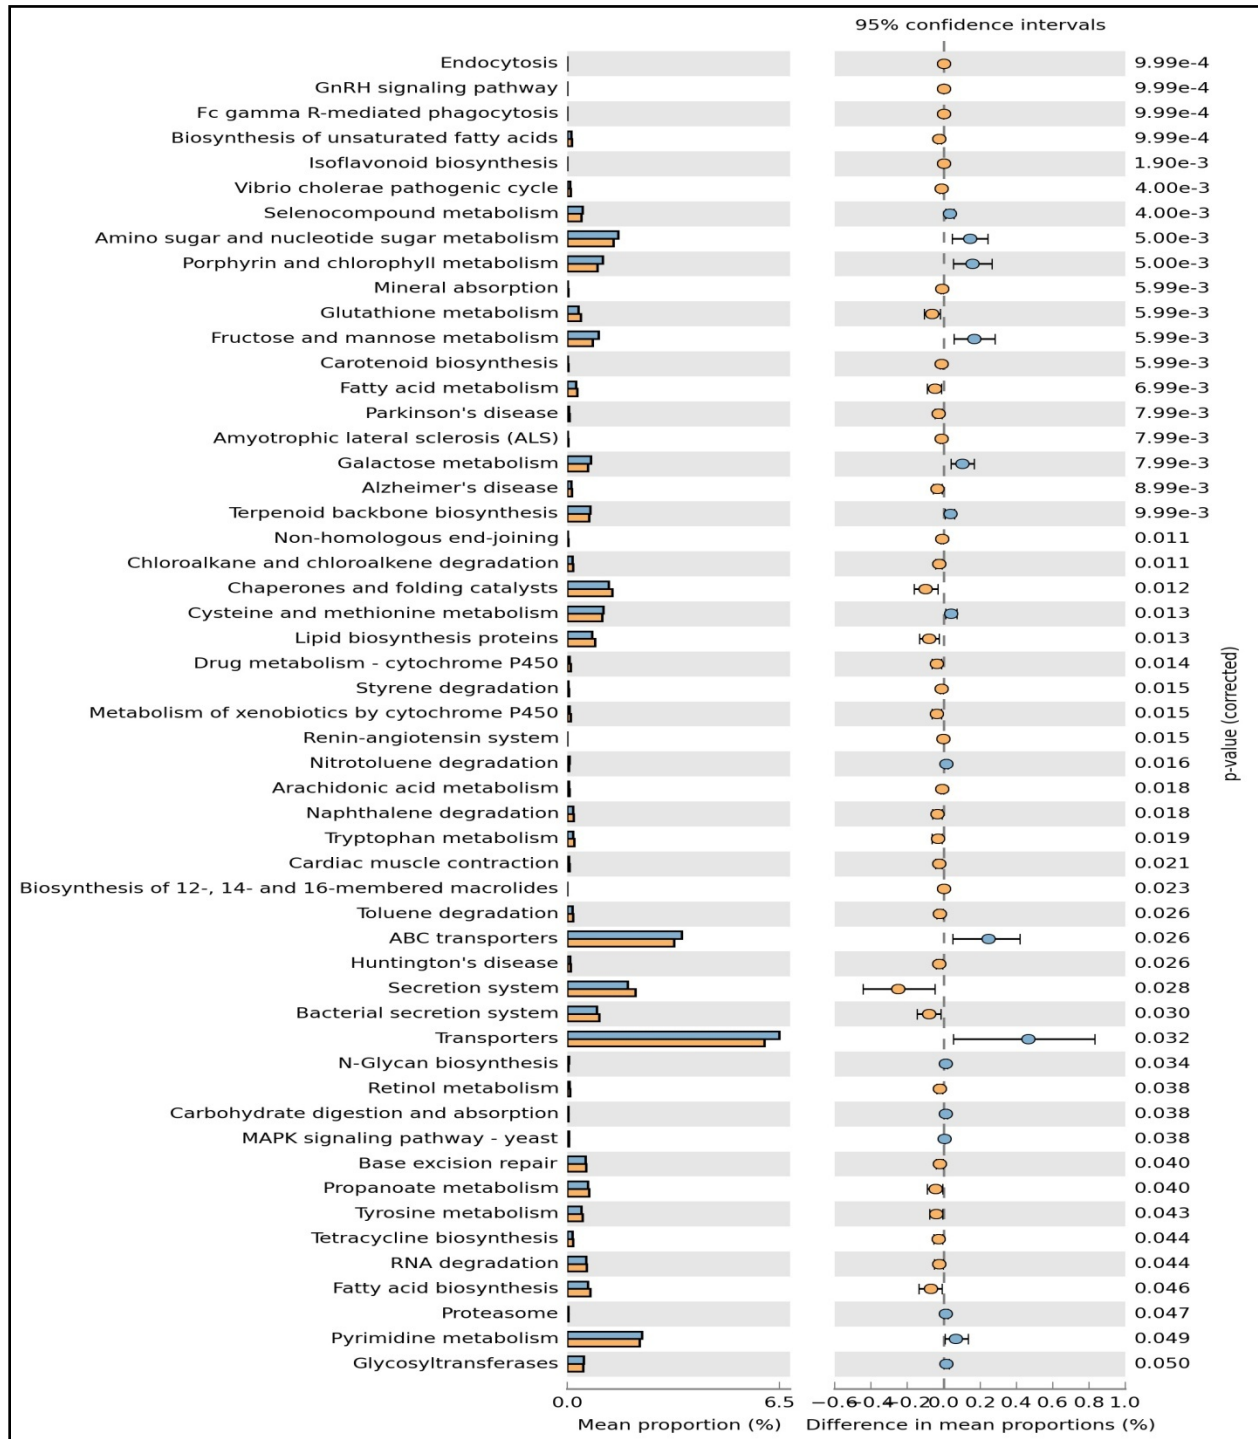

**Supplementary Table 4: Observed number of OTUs at a 3% dissimilarity level and the diversity estimate database for species richness in forty CP samples.**

| Level_1                                                                          | Level_2   | Level_3 | Level_4 | Level_5 | Level_6 | Level_7 | Observatio | CP1 |
|----------------------------------------------------------------------------------|-----------|---------|---------|---------|---------|---------|------------|-----|
| k__Bacteri;p__Actinot;c__Actinob o__Actinonf__Propion g__Propior s__acnes        | ID1000517 | 0       |         |         |         |         |            |     |
| k__Bacteri;p__Bacterc c__Bactero o__Bacterc f__Prevote g__Prevote s__nanceie     | ID1001920 | 1       |         |         |         |         |            |     |
| k__Bacteri;p__Firmicu c__Clostrid o__Clostrid f__Lachnos g__Lachno; s__orale     | ID1009036 | 1       |         |         |         |         |            |     |
| k__Bacteri;p__Firmicu c__Clostrid o__Clostrid f__Veillone g__Veillone s__parvula | ID1009968 | 37      |         |         |         |         |            |     |
| k__Bacteri;p__Proteol c__Gamma o__Pseudo f__Moraxe g__Acineto s__schindle        | ID1012848 | 0       |         |         |         |         |            |     |
| k__Bacteri;p__Proteol c__Gamma o__Pasteur f__Pasteur g__Haemo; s__parainfl       | ID1016422 | 1       |         |         |         |         |            |     |
| k__Bacteri;p__Actinot;c__Actinob o__Actinonf__Corynek g__Corynel s__durum        | ID1017764 | 0       |         |         |         |         |            |     |
| k__Bacteri;p__Proteol c__Gamma o__Pasteur f__Pasteur g__Actinob s__paraha        | ID1019193 | 0       |         |         |         |         |            |     |
| k__Bacteri;p__Firmicu c__Clostrid o__Clostrid f__Veillone g__Veillone s__dispar  | ID1019878 | 0       |         |         |         |         |            |     |
| k__Bacteri;p__Firmicu c__Bacilli o__Lactoba f__Lactoba g__Lactoba s__salivari    | ID1021172 | 0       |         |         |         |         |            |     |
| k__Bacteri;p__Actinot;c__Actinob o__Actinonf__Nocardi g__Rhodoc s__fascians      | ID1021308 | 0       |         |         |         |         |            |     |
| k__Bacteri;p__Bacterc c__Bactero o__Bacterc f__Prevote g__Prevote s__nigresce    | ID1028549 | 6       |         |         |         |         |            |     |
| k__Bacteri;p__Bacterc c__Flavoba o__Flavoba f__Flavoba g__Capnoc s__ochrace      | ID102901  | 109     |         |         |         |         |            |     |
| k__Bacteri;p__Proteol c__Alphapr o__Sphingc f__Sphingo g__Sphingc s__asaccha     | ID102915  | 0       |         |         |         |         |            |     |
| k__Bacteri;p__Firmicu c__Bacilli o__Lactoba f__Lactoba g__Lactoba s__iners       | ID1033552 | 0       |         |         |         |         |            |     |
| k__Bacteri;p__Bacterc c__Bactero o__Bacterc f__Prevote g__Prevote s__pallens     | ID1033790 | 1       |         |         |         |         |            |     |
| k__Bacteri;p__Proteol c__Gamma o__Xantho f__Xanthor g__Pseudo s__mexicar         | ID104184  | 0       |         |         |         |         |            |     |
| k__Bacteri;p__Firmicu c__Bacilli o__Lactoba f__Strepto g__Strepto s__anginos     | ID1047674 | 1       |         |         |         |         |            |     |
| k__Bacteri;p__Firmicu c__Bacilli o__Lactoba f__Strepto g__Strepto s__agalacti    | ID1059977 | u       |         |         |         |         |            |     |
| k__Bacteri;p__Firmicu c__Clostrid o__Clostrid f__Peptost g__Peptost s__anaerok   | ID105998  | 0       |         |         |         |         |            |     |
| k__Bacteri;p__Proteol c__Alphapr o__Rhizobi f__Methylo g__Methylo s__adhaesi     | ID1074248 | 0       |         |         |         |         |            |     |
| k__Bacteri;p__Proteol c__Deltapr o__Desulfo f__Desulfo g__Desulfo s__rhabdof     | ID10829   | 0       |         |         |         |         |            |     |
| k__Bacteri;p__Firmicu c__Clostrid o__Clostrid f__Veillone g__Selenor s__noxia    | ID1086250 | 6       |         |         |         |         |            |     |
| k__Bacteri;p__Proteol c__Betaprc o__Neisser f__Neisseri g__Neisser s__bacillifo  | ID1106060 | 0       |         |         |         |         |            |     |
| k__Bacteri;p__Bacterc c__Flavoba o__Flavoba f__Flavoba g__Flavoba s__gelidila    | ID1107152 | 0       |         |         |         |         |            |     |
| k__Bacteri;p__Proteol c__Gamma o__Pseudo f__Pseudor g__Pseudo s__alcalige        | ID1107697 | 0       |         |         |         |         |            |     |
| k__Bacteri;p__Synergi c__Synergi o__Synergi f__Dethios g__Pyramic s__piscoler    | ID1120396 | 0       |         |         |         |         |            |     |
| k__Bacteri;p__Actinot;c__Actinob o__Actinonf__Dermab g__Devries s__agamar        | ID1126230 | 0       |         |         |         |         |            |     |
| k__Bacteri;p__Actinot;c__Actinob o__Actinonf__Microcc g__Rothia s__terrae        | ID1128355 | 2       |         |         |         |         |            |     |
| k__Bacteri;p__Fusoba c__Fusoba o__Fusoba f__Leptotri g__Strepto s__monilif       | ID11292   | 0       |         |         |         |         |            |     |
| k__Bacteri;p__Firmicu c__Bacilli o__Lactoba f__Enteroc g__Enteroc s__haemo       | ID1129461 | 0       |         |         |         |         |            |     |
| k__Bacteri;p__Firmicu c__Clostrid o__Clostrid f__Clostrid g__Protein s__ethanol  | ID1133895 | 0       |         |         |         |         |            |     |
| k__Bacteri;p__Proteol c__Gamma o__Xantho f__Xanthor g__Pseudo s__kaohsiu         | ID1135553 | 0       |         |         |         |         |            |     |
| k__Bacteri;p__Bacterc c__Flavoba o__Flavoba f__Flavoba g__Zhouia s__amyloly      | ID1136009 | 3       |         |         |         |         |            |     |
| k__Bacteri;p__Proteol c__Betaprc o__Burkho f__Comam g__Aquinc s__tertiaric       | ID1137566 | 0       |         |         |         |         |            |     |
| k__Bacteri;p__Actinot;c__Actinob o__Actinonf__Mycoba g__Mycoba s__vaccae         | ID113826  | 0       |         |         |         |         |            |     |
| k__Bacteri;p__Bacterc c__Flavoba o__Flavoba f__Flavoba g__Lutaone s__thermo      | ID1138276 | 0       |         |         |         |         |            |     |
| k__Bacteri;p__Proteol c__Gamma o__Cardio f__Cardio b__Suttone s__ornitho         | ID1139148 | 0       |         |         |         |         |            |     |
| k__Bacteri;p__Proteol c__Alphapr o__Sphingc f__Sphingo g__Sphingc s__mali        | ID1139751 | 1       |         |         |         |         |            |     |
| k__Bacteri;p__Actinot;c__Corioba o__Corioba f__Corioba g__Paraeg s__hongko       | ID1140324 | 0       |         |         |         |         |            |     |
| k__Bacteri;p__Proteol c__Gamma o__Alteron f__[Chrom; g__Rheinh s__perlucic       | ID1141610 | 0       |         |         |         |         |            |     |
| k__Bacteri;p__Actinot;c__Actinob o__Actinonf__Nocardi g__Marmo s__aequor         | ID1142974 | 0       |         |         |         |         |            |     |
| k__Bacteri;p__Firmicu c__Clostrid o__Clostrid f__Veillone g__Selenor s__bovis    | ID1143338 | 13      |         |         |         |         |            |     |
| k__Bacteri;p__Proteol c__Gamma o__Alteron f__Shewan g__Shewar s__algae           | ID115224  | 2       |         |         |         |         |            |     |
| k__Bacteri;p__Actinot;c__Actinob o__Actinonf__Actinon g__Actinon s__hyovagi      | ID12569   | 7       |         |         |         |         |            |     |
| k__Bacteri;p__Proteol c__Epsilon o__Campyl f__Helicob; g__Wolinel s__succino     | ID128801  | 0       |         |         |         |         |            |     |
| k__Bacteri;p__Actinot;c__Actinob o__Actinonf__Corynek g__Corynel s__pilosum      | ID13467   | 0       |         |         |         |         |            |     |

|                                                                                          |    |
|------------------------------------------------------------------------------------------|----|
| k__Bacteri;p__Proteolc__Alphaprc__Rhizobi f__Rhizobi g__Shinella s__granuli ID136134     | 0  |
| k__Bacteri;p__Proteolc__Gammao__Xantho f__Xanthor g__Pseudo s__indica ID146193           | 0  |
| k__Bacteri;p__Firmicu c__Bacilli o__Lactoba f__Strepto g__Strepto s__minor ID150451      | 0  |
| k__Bacteri;p__Firmicu c__Bacilli o__Lactoba f__Aerococ g__Granuli s__balaenci ID15059    | 4  |
| k__Bacteri;p__Proteolc__Gammao__Oceanc f__Halomo g__Halomc s__phoceaci ID153241          | 1  |
| k__Bacteri;p__Firmicu c__Bacilli o__Lactoba f__Strepto g__Strepto s__equi ID15355        | 0  |
| k__Bacteri;p__Proteolc__Betaprc o__Trembl f__Trembla g__Carson s__ruddii ID1543534       | 1  |
| k__Bacteri;p__Bacterc c__Bactero o__Bacterc f__Porphyr g__Macelli s__ferment ID158646    | 1  |
| k__Bacteri;p__Verrucc c__Verrucc o__Verrucc f__Verruco g__Verrucc s__spinosu ID1596      | 0  |
| k__Bacteri;p__Proteolc__Betaprc o__Burkho f__Comam g__Comam s__terrigen ID1639373        | 0  |
| k__Bacteri;p__Firmicu c__Bacilli o__Lactoba f__Strepto g__Strepto s__sobrinu ID167118    | 0  |
| k__Bacteri;p__Proteolc__Gammao__Enterol f__Enterob g__Shigella s__boydii ID1780074       | 0  |
| k__Bacteri;p__Proteolc__Betaprc o__Burkho f__Comam g__[Polyan s__brachys ID181669        | 0  |
| k__Bacteri;p__Proteolc__Gammao__Pseudo f__Moraxe g__Acineto s__venetia ID181761          | 0  |
| k__Bacteri;p__Firmicu c__Bacilli o__Lactoba f__Lactoba g__Lactoba s__mucosa ID1911770    | 0  |
| k__Bacteri;p__Actinoc c__Actinob o__Actinon f__Microcc g__Rothia s__amarae ID1925093     | 0  |
| k__Bacteri;p__Bacterc c__Bactero o__Bacterc f__Porphyr g__Porphy s__endodo ID1938        | 1  |
| k__Bacteri;p__Proteolc__Gammao__Alteron f__Shewan g__Shewar s__amazon ID197265           | 0  |
| k__Bacteri;p__Bacterc c__Bactero o__Bacterc f__[Parapr g__[Prevot s__tannera ID2047      | 5  |
| k__Bacteri;p__Bacterc c__Bactero o__Bacterc f__Prevote g__Prevote s__interme ID2218      | 25 |
| k__Bacteri;p__Proteolc__Gammao__Pseudo f__Moraxe g__Moraxe s__ovis ID223485              | 0  |
| k__Bacteri;p__Spiroch c__Spiroch o__Spiroch f__Spirochi g__Treponi s__socrans ID2310825  | 2  |
| k__Bacteri;p__Actinoc c__Actinob o__Actinon f__Tsukam g__Gordon s__kropper ID236778      | 0  |
| k__Bacteri;p__Proteolc__Alphaprc o__Rhizobi f__Methylc g__Magnet s__magnet ID237209      | 0  |
| k__Bacteri;p__Actinoc c__Actinob o__Actinon f__Beutenl g__Beutenl s__caverna ID2500552   | 0  |
| k__Bacteri;p__Actinoc c__Corioba o__Corioba f__Corioba g__Atopob s__rimae ID251702       | 0  |
| k__Bacteri;p__Proteolc__Betaprc o__Burkho f__Comam g__Brachyr s__chirono ID265983        | 0  |
| k__Bacteri;p__Elusimic c__Elusimic o__Elusimi f__Elusimic g__Elusimi s__minutu ID278595  | 0  |
| k__Bacteri;p__Plancto c__Plancto o__Pirellul f__Pirellula g__plancto s__MS139 ID2905450  | 0  |
| k__Bacteri;p__Spiroch c__Spiroch o__Spiroch f__Spirochi g__Treponi s__amylov ID29328     | 0  |
| k__Bacteri;p__Firmicu c__Clostrid o__Clostrid f__Veillone g__Aceton s__longum ID3107842  | 0  |
| k__Bacteri;p__Bacterc c__Flavoba o__Flavoba f__Flavoba g__Capnoc s__canimo ID314128      | 0  |
| k__Bacteri;p__Proteolc__Gammao__Alteron f__[Chromi g__Rheinh s__nanhaie ID325282         | 0  |
| k__Bacteri;p__Teneric c__Mollicu o__Mycopl f__Mycopli g__Mycopl s__zalophi ID336960      | 0  |
| k__Bacteri;p__Bacterc c__Bactero o__Bacterc f__Bactero g__Bacterc s__nordii ID344827     | 0  |
| k__Bacteri;p__Firmicu c__Bacilli o__Lactoba f__Leucon g__Weissel s__parame ID352468      | 0  |
| k__Bacteri;p__Firmicu c__Bacilli o__Bacillal f__Planoco g__Staphyl s__saprop ID354839    | 0  |
| k__Bacteri;p__Proteolc__Gammao__Pasteur f__Pasteur g__Galliba s__genomc ID359719         | 0  |
| k__Bacteri;p__Actinoc c__Actinob o__Bifidob f__Bifidoba g__Bifidob s__bifidum ID365385   | 0  |
| k__Bacteri;p__Spiroch c__Spiroch o__Spiroch f__Spirochi g__Treponi s__phagedi ID3928     | 0  |
| k__Bacteri;p__Proteolc__Gammao__Aeromc f__Aeromo g__Aeromc s__sanarell ID4006670         | 0  |
| k__Bacteri;p__Firmicu c__Erysipel o__Erysipe f__Erysipel g__Bulleidi s__moorei ID4030370 | 0  |
| k__Bacteri;p__Proteolc__Gammao__Pseudo f__Moraxe g__Enhydr s__aerosac ID407441           | 0  |
| k__Bacteri;p__Proteolc__Epsilon o__Campyl f__Campyl g__Campyl s__rectus ID416537         | 15 |
| k__Bacteri;p__Proteolc__Betaprc o__Neisser f__Neisseri g__Neisser s__shayega ID4233669   | 0  |
| k__Bacteri;p__Proteolc__Gammao__Vibriof__Pseudo g__Vibrio s__mimicu ID4270835            | 0  |
| k__Bacteri;p__Bacterc c__Flavoba o__Flavoba f__[Weeks g__Bergey s__zoohelc ID4297519     | 1  |
| k__Bacteri;p__Proteolc__Gammao__Pseudo f__Pseudor g__Pseudo s__cuatroc ID4301996         | 0  |
| k__Bacteri;p__Proteolc__Gammao__Xantho f__Xanthor g__Stenotr s__rhizoph ID4331923        | 0  |
| k__Bacteri;p__Firmicu c__Clostrid o__Clostrid f__Lachnos g__Johnsor s__ignava ID4332505  | 0  |

|                                                                                   |           |     |
|-----------------------------------------------------------------------------------|-----------|-----|
| k__Bacteri;p__Proteol c__Betaprc o__Neisser f__Neisseri g__Neisser s__wadswc      | ID4335663 | 0   |
| k__Bacteri;p__Proteol c__Betaprc o__Neisser f__Neisseri g__Neisser s__weaveri     | ID4337487 | 1   |
| k__Bacteri;p__Fusoba c__Fusoba o__Fusoba f__Leptotri g__Sebalde s__termitic       | ID4358870 | 15  |
| k__Bacteri;p__Proteol c__Alphapr o__Rhizobi f__Bradyrh g__Afipia s__clevelar      | ID4367627 | 0   |
| k__Bacteri;p__Firmicu c__Clostrid o__Clostrid f__Clostrid g__Clostrid s__caminit  | ID4368040 | 0   |
| k__Bacteri;p__Proteol c__Betaprc o__Neisser f__Neisseri g__Neisser s__oralis      | ID4373910 | 368 |
| k__Bacteri;p__Proteol c__Betaprc o__Burkho f__Comam g__Leptoth s__ginseng         | ID4395318 | 0   |
| k__Bacteri;p__Firmicu c__Clostrid o__Clostrid f__Clostrid g__Clostrid s__aciduric | ID4462654 | 0   |
| k__Bacteri;p__Proteol c__Betaprc o__Neisser f__Neisseri g__Kingella s__potus      | ID4476050 | 0   |
| k__Bacteri;p__Synergi c__Synergi o__Synergi f__Dethios g__Jonquei s__anthrop      | ID484439  | 0   |
| k__Bacteri;p__Firmicu c__Clostrid o__Clostrid f__Lachnos g__Moryell s__indolige   | ID514200  | 1   |
| k__Bacteri;p__Plancto c__Plancto o__Gemma f__Isospha g__Nostoc s__limicola        | ID51778   | 0   |
| k__Bacteri;p__Proteol c__Gamma o__Cardiok f__Cardiob g__Cardiok s__valvaru        | ID544152  | 8   |
| k__Bacteri;p__Proteol c__Alphapr o__Rhizobi f__Beijerin g__Chelato s__asaccha     | ID548469  | 0   |
| k__Bacteri;p__Proteol c__Gamma o__Pseudo f__Moraxe g__Alkanin s__illinoise        | ID552246  | 0   |
| k__Bacteri;p__Proteol c__Gamma o__Enterok f__Enterob g__Serratia s__symbiot       | ID576678  | 0   |
| k__Bacteri;p__Proteol c__Betaprc o__Neisser f__Neisseri g__Neisser s__elongat     | ID6402    | 3   |
| k__Bacteri;p__Proteol c__Gamma o__Pseudo f__Pseudor g__Pseudo s__compos           | ID673640  | 0   |
| k__Bacteri;p__Firmicu c__Bacilli o__Lactoba f__Aerococ g__Abiotro s__defectiv     | ID678690  | 0   |
| k__Bacteri;p__Firmicu c__Clostrid o__Clostrid f__Veillone g__Anaero s__glycerin   | ID731367  | 6   |
| k__Bacteri;p__Firmicu c__Erysipel o__Erysipe f__Erysipel g__Anaero s__furcosa     | ID761476  | 0   |
| k__Bacteri;p__Proteol c__Alphapr o__Rhodos f__Rhodos g__Reyran s__massilie        | ID801271  | 0   |
| k__Bacteri;p__Proteol c__Alphapr o__Rhodos f__Acetoba g__Acidispl s__rubrifac     | ID806916  | 0   |
| k__Bacteri;p__Proteol c__Gamma o__Pseudo f__Pseudor g__Pseudo s__alcaliph         | ID83866   | 0   |
| k__Bacteri;p__Firmicu c__Clostrid o__Clostrid f__Lachnos g__Shuttle s__satelles   | ID851782  | 0   |
| k__Bacteri;p__Proteol c__Betaprc o__Neisser f__Neisseri g__Kingella s__denitrifi  | ID851932  | 29  |
| k__Bacteri;p__Proteol c__Gamma o__Pasteur f__Pasteur g__Pasteur s__aeroger        | ID9498    | 0   |
| k__Bacteri;p__Proteol c__Gamma o__Pasteur f__Pasteur g__Actinob s__delphin        | ID9510    | 0   |

tes. The high quality seuenes were processed through Mothur package against gg\_13\_8\_99.gg.tax

| CP10 | CP11 | CP12 | CP13 | CP14 | CP15 | CP16 | CP17 | CP18 |
|------|------|------|------|------|------|------|------|------|
| 0    | 0    | 0    | 0    | 0    | 0    | 0    | 0    | 1    |
| 0    | 0    | 0    | 0    | 0    | 0    | 0    | 0    | 0    |
| 14   | 6    | 15   | 1    | 8    | 22   | 25   | 1    | 3    |
| 103  | 8    | 11   | 109  | 5    | 258  | 225  | 23   | 194  |
| 0    | 0    | 0    | 0    | 0    | 0    | 0    | 0    | 0    |
| 0    | 0    | 0    | 0    | 0    | 0    | 0    | 0    | 0    |
| 0    | 0    | 0    | 0    | 0    | 0    | 0    | 0    | 0    |
| 0    | 0    | 0    | 0    | 0    | 0    | 0    | 0    | 0    |
| 0    | 0    | 0    | 0    | 0    | 0    | 0    | 0    | 0    |
| 0    | 0    | 0    | 1    | 0    | 0    | 0    | 0    | 2    |
| 0    | 0    | 0    | 0    | 0    | 0    | 0    | 0    | 0    |
| 65   | 60   | 150  | 3    | 64   | 29   | 12   | 0    | 11   |
| 23   | 10   | 23   | 78   | 42   | 194  | 69   | 30   | 46   |
| 0    | 0    | 0    | 0    | 0    | 0    | 0    | 0    | 0    |
| 1    | 0    | 0    | 0    | 0    | 0    | 0    | 0    | 0    |
| 0    | 5    | 14   | 0    | 0    | 0    | 1    | 1    | 2    |
| 0    | 0    | 0    | 0    | 0    | 0    | 0    | 0    | 0    |
| 62   | 0    | 0    | 0    | 0    | 0    | 2    | 0    | 0    |
| 7    | 12   | 15   | 166  | 25   | 25   | 91   | 38   | 38   |
| 13   | 19   | 42   | 0    | 0    | 0    | 1    | 5    | 1    |
| 0    | 0    | 0    | 0    | 0    | 0    | 0    | 0    | 0    |
| 17   | 7    | 6    | 0    | 0    | 0    | 6    | 4    | 1    |
| 2    | 7    | 10   | 19   | 89   | 307  | 4    | 1    | 0    |
| 0    | 0    | 0    | 0    | 0    | 0    | 0    | 0    | 13   |
| 0    | 0    | 0    | 0    | 0    | 0    | 0    | 0    | 0    |
| 0    | 0    | 0    | 0    | 0    | 0    | 0    | 0    | 0    |
| 18   | 3    | 13   | 0    | 0    | 0    | 2    | 0    | 0    |
| 0    | 0    | 0    | 0    | 0    | 0    | 0    | 0    | 0    |
| 2    | 0    | 1    | 3    | 2    | 5    | 0    | 1    | 15   |
| 0    | 0    | 0    | 0    | 0    | 0    | 0    | 0    | 0    |
| 0    | 0    | 0    | 0    | 0    | 0    | 0    | 0    | 0    |
| 0    | 0    | 0    | 0    | 0    | 0    | 0    | 0    | 0    |
| 0    | 0    | 0    | 0    | 0    | 0    | 0    | 0    | 0    |
| 1    | 0    | 0    | 4    | 2    | 0    | 1    | 0    | 2    |
| 0    | 0    | 0    | 0    | 0    | 0    | 0    | 0    | 0    |
| 0    | 0    | 0    | 0    | 0    | 0    | 0    | 0    | 0    |
| 0    | 1    | 0    | 0    | 0    | 0    | 0    | 0    | 0    |
| 0    | 0    | 0    | 0    | 0    | 0    | 0    | 0    | 0    |
| 0    | 2    | 2    | 0    | 0    | 0    | 3    | 1    | 2    |
| 0    | 0    | 0    | 0    | 0    | 0    | 0    | 0    | 0    |
| 0    | 0    | 0    | 0    | 0    | 0    | 0    | 0    | 0    |
| 0    | 0    | 0    | 0    | 0    | 0    | 0    | 0    | 0    |
| 235  | 95   | 148  | 21   | 83   | 132  | 8    | 22   | 6    |
| 1    | 2    | 1    | 0    | 0    | 0    | 0    | 1    | 2    |
| 0    | 1    | 2    | 9    | 5    | 16   | 3    | 0    | 14   |
| 0    | 0    | 0    | 0    | 0    | 0    | 0    | 0    | 0    |
| 0    | 1    | 0    | 0    | 0    | 3    | 0    | 0    | 0    |

|     |     |     |    |    |    |    |     |    |
|-----|-----|-----|----|----|----|----|-----|----|
| 0   | 0   | 0   | 0  | 0  | 0  | 0  | 0   | 0  |
| 0   | 0   | 0   | 0  | 0  | 0  | 0  | 0   | 0  |
| 0   | 0   | 0   | 0  | 0  | 0  | 0  | 0   | 0  |
| 0   | 1   | 6   | 23 | 1  | 9  | 18 | 5   | 5  |
| 3   | 8   | 7   | 1  | 1  | 5  | 3  | 6   | 0  |
| 0   | 0   | 0   | 0  | 0  | 0  | 0  | 0   | 0  |
| 2   | 5   | 5   | 63 | 1  | 5  | 5  | 1   | 7  |
| 84  | 275 | 669 | 3  | 28 | 10 | 80 | 95  | 45 |
| 0   | 0   | 0   | 0  | 0  | 0  | 0  | 0   | 0  |
| 0   | 0   | 0   | 0  | 0  | 0  | 0  | 0   | 0  |
| 0   | 0   | 0   | 0  | 0  | 0  | 0  | 0   | 13 |
| 0   | 0   | 0   | 0  | 0  | 0  | 0  | 0   | 0  |
| 0   | 0   | 0   | 0  | 0  | 0  | 0  | 0   | 0  |
| 0   | 0   | 0   | 0  | 0  | 0  | 0  | 0   | 0  |
| 0   | 0   | 0   | 0  | 1  | 0  | 0  | 0   | 0  |
| 0   | 0   | 0   | 0  | 0  | 0  | 0  | 0   | 0  |
| 46  | 12  | 25  | 0  | 1  | 1  | 18 | 59  | 13 |
| 0   | 0   | 0   | 0  | 0  | 0  | 1  | 0   | 0  |
| 48  | 57  | 105 | 0  | 15 | 5  | 13 | 15  | 3  |
| 82  | 1   | 4   | 0  | 8  | 1  | 5  | 384 | 89 |
| 0   | 0   | 0   | 0  | 0  | 0  | 0  | 0   | 0  |
| 28  | 28  | 58  | 0  | 11 | 3  | 1  | 18  | 1  |
| 0   | 0   | 0   | 0  | 0  | 0  | 0  | 0   | 0  |
| 0   | 0   | 0   | 0  | 0  | 0  | 0  | 0   | 0  |
| 0   | 0   | 0   | 0  | 0  | 0  | 0  | 0   | 0  |
| 0   | 0   | 3   | 0  | 5  | 1  | 2  | 0   | 0  |
| 4   | 2   | 4   | 0  | 0  | 0  | 3  | 0   | 0  |
| 0   | 0   | 0   | 0  | 0  | 0  | 0  | 1   | 0  |
| 0   | 0   | 0   | 0  | 0  | 0  | 0  | 0   | 0  |
| 11  | 0   | 0   | 0  | 0  | 0  | 1  | 36  | 2  |
| 0   | 0   | 0   | 0  | 0  | 0  | 0  | 0   | 0  |
| 0   | 0   | 0   | 0  | 0  | 1  | 0  | 0   | 0  |
| 0   | 0   | 0   | 0  | 0  | 0  | 0  | 0   | 0  |
| 0   | 1   | 0   | 0  | 0  | 0  | 0  | 4   | 0  |
| 1   | 0   | 7   | 0  | 0  | 0  | 0  | 3   | 0  |
| 0   | 0   | 0   | 0  | 0  | 0  | 0  | 0   | 0  |
| 0   | 0   | 0   | 0  | 0  | 0  | 0  | 0   | 0  |
| 0   | 0   | 0   | 0  | 0  | 0  | 0  | 0   | 0  |
| 0   | 0   | 0   | 0  | 0  | 0  | 0  | 0   | 0  |
| 10  | 22  | 37  | 1  | 11 | 1  | 5  | 22  | 6  |
| 0   | 0   | 0   | 0  | 0  | 0  | 0  | 0   | 0  |
| 1   | 4   | 4   | 0  | 3  | 0  | 1  | 0   | 0  |
| 0   | 0   | 0   | 0  | 0  | 0  | 0  | 0   | 0  |
| 144 | 34  | 48  | 1  | 16 | 56 | 41 | 15  | 4  |
| 0   | 0   | 0   | 0  | 0  | 0  | 0  | 0   | 0  |
| 0   | 0   | 0   | 0  | 0  | 0  | 0  | 0   | 0  |
| 0   | 1   | 1   | 9  | 0  | 0  | 5  | 2   | 0  |
| 0   | 0   | 0   | 0  | 0  | 0  | 0  | 0   | 0  |
| 0   | 0   | 0   | 0  | 0  | 0  | 0  | 0   | 0  |
| 10  | 3   | 4   | 1  | 0  | 2  | 1  | 13  | 0  |





| CP19 | CP2 | CP20 | CP21 | CP22 | CP23 | CP24 | CP26 | CP27 |    |
|------|-----|------|------|------|------|------|------|------|----|
|      | 0   | 0    | 0    | 0    | 0    | 0    | 2    | 0    | 0  |
|      | 0   | 6    | 0    | 1    | 0    | 0    | 0    | 0    | 5  |
|      | 4   | 2    | 14   | 1    | 6    | 7    | 4    | 11   | 2  |
|      | 20  | 0    | 15   | 7    | 158  | 13   | 188  | 50   | 29 |
|      | 0   | 0    | 0    | 0    | 0    | 0    | 0    | 0    | 0  |
|      | 0   | 0    | 0    | 0    | 0    | 0    | 0    | 0    | 0  |
|      | 0   | 0    | 0    | 0    | 0    | 0    | 3    | 0    | 0  |
|      | 0   | 0    | 0    | 0    | 0    | 0    | 2    | 0    | 0  |
|      | 0   | 0    | 0    | 0    | 0    | 0    | 0    | 0    | 0  |
|      | 0   | 0    | 0    | 0    | 0    | 0    | 0    | 0    | 0  |
|      | 0   | 0    | 0    | 0    | 0    | 0    | 0    | 0    | 0  |
|      | 27  | 66   | 15   | 1    | 17   | 77   | 45   | 12   | 18 |
|      | 108 | 2    | 44   | 623  | 332  | 47   | 137  | 192  | 44 |
|      | 0   | 0    | 0    | 0    | 0    | 0    | 0    | 0    | 0  |
|      | 0   | 0    | 0    | 0    | 0    | 0    | 0    | 0    | 0  |
|      | 0   | 0    | 0    | 0    | 0    | 0    | 3    | 0    | 10 |
|      | 0   | 0    | 0    | 0    | 0    | 0    | 0    | 0    | 0  |
|      | 0   | 0    | 0    | 0    | 0    | 0    | 0    | 1    | 0  |
|      | 75  | 3    | 28   | 91   | 25   | 18   | 65   | 39   | 30 |
|      | 1   | 0    | 0    | 0    | 1    | 9    | 4    | 2    | 0  |
|      | 0   | 0    | 0    | 0    | 0    | 0    | 0    | 0    | 0  |
|      | 5   | 6    | 1    | 0    | 0    | 0    | 0    | 0    | 1  |
|      | 0   | 5    | 0    | 0    | 25   | 68   | 5    | 5    | 7  |
|      | 2   | 5    | 0    | 40   | 0    | 1    | 1    | 0    | 1  |
|      | 0   | 0    | 0    | 0    | 0    | 0    | 0    | 0    | 0  |
|      | 0   | 0    | 0    | 0    | 0    | 0    | 0    | 0    | 0  |
|      | 0   | 0    | 0    | 0    | 0    | 0    | 0    | 27   | 0  |
|      | 0   | 0    | 0    | 0    | 0    | 0    | 0    | 0    | 0  |
|      | 9   | 0    | 0    | 4    | 6    | 1    | 10   | 0    | 2  |
|      | 0   | 0    | 0    | 0    | 0    | 0    | 0    | 0    | 0  |
|      | 0   | 0    | 0    | 0    | 0    | 0    | 0    | 0    | 0  |
|      | 0   | 0    | 0    | 0    | 0    | 0    | 0    | 0    | 0  |
|      | 0   | 0    | 0    | 0    | 0    | 0    | 0    | 0    | 0  |
|      | 6   | 0    | 5    | 1    | 1    | 0    | 5    | 6    | 0  |
|      | 0   | 0    | 0    | 0    | 0    | 0    | 0    | 0    | 0  |
|      | 0   | 0    | 0    | 0    | 0    | 0    | 0    | 0    | 0  |
|      | 0   | 0    | 0    | 0    | 0    | 0    | 0    | 0    | 0  |
|      | 0   | 0    | 0    | 0    | 0    | 0    | 0    | 0    | 0  |
|      | 0   | 0    | 0    | 0    | 1    | 0    | 0    | 0    | 0  |
|      | 1   | 0    | 0    | 0    | 1    | 0    | 7    | 0    | 1  |
|      | 0   | 0    | 1    | 0    | 0    | 0    | 0    | 0    | 0  |
|      | 0   | 0    | 0    | 0    | 0    | 0    | 0    | 0    | 0  |
|      | 0   | 0    | 0    | 0    | 0    | 0    | 0    | 0    | 0  |
|      | 33  | 9    | 94   | 0    | 15   | 66   | 3    | 24   | 44 |
|      | 1   | 0    | 0    | 0    | 0    | 1    | 3    | 1    | 0  |
|      | 15  | 0    | 12   | 0    | 12   | 3    | 11   | 4    | 0  |
|      | 0   | 1    | 0    | 0    | 0    | 0    | 0    | 0    | 0  |
|      | 0   | 0    | 2    | 0    | 0    | 1    | 2    | 0    | 0  |

|    |    |    |    |    |     |    |    |    |
|----|----|----|----|----|-----|----|----|----|
| 0  | 0  | 0  | 0  | 0  | 0   | 0  | 0  | 0  |
| 0  | 0  | 0  | 0  | 0  | 0   | 0  | 0  | 0  |
| 0  | 0  | 0  | 0  | 0  | 0   | 0  | 0  | 0  |
| 10 | 2  | 3  | 41 | 6  | 4   | 53 | 3  | 10 |
| 3  | 1  | 0  | 0  | 0  | 4   | 11 | 0  | 0  |
| 1  | 0  | 0  | 0  | 1  | 0   | 0  | 0  | 0  |
| 2  | 3  | 4  | 28 | 10 | 4   | 10 | 3  | 11 |
| 32 | 22 | 33 | 1  | 0  | 121 | 5  | 29 | 58 |
| 0  | 0  | 0  | 0  | 0  | 0   | 0  | 0  | 0  |
| 0  | 0  | 0  | 0  | 0  | 0   | 0  | 0  | 0  |
| 0  | 0  | 0  | 0  | 0  | 0   | 7  | 0  | 0  |
| 0  | 0  | 0  | 0  | 0  | 0   | 0  | 0  | 0  |
| 0  | 0  | 0  | 0  | 0  | 0   | 0  | 0  | 0  |
| 0  | 0  | 0  | 0  | 0  | 0   | 0  | 0  | 0  |
| 0  | 0  | 0  | 0  | 0  | 0   | 0  | 0  | 0  |
| 0  | 0  | 0  | 0  | 0  | 1   | 1  | 0  | 0  |
| 15 | 8  | 40 | 2  | 0  | 46  | 1  | 4  | 1  |
| 0  | 0  | 0  | 0  | 0  | 1   | 1  | 0  | 0  |
| 0  | 24 | 10 | 0  | 0  | 6   | 1  | 60 | 0  |
| 77 | 35 | 61 | 1  | 3  | 1   | 4  | 2  | 42 |
| 0  | 0  | 0  | 0  | 0  | 0   | 0  | 0  | 0  |
| 5  | 12 | 13 | 0  | 0  | 6   | 1  | 12 | 1  |
| 0  | 0  | 0  | 0  | 0  | 0   | 0  | 0  | 0  |
| 0  | 0  | 0  | 0  | 0  | 0   | 0  | 0  | 0  |
| 0  | 0  | 0  | 0  | 0  | 0   | 0  | 0  | 0  |
| 3  | 0  | 1  | 0  | 2  | 5   | 2  | 7  | 1  |
| 0  | 0  | 1  | 0  | 0  | 1   | 0  | 0  | 0  |
| 0  | 0  | 0  | 0  | 0  | 0   | 0  | 0  | 0  |
| 0  | 0  | 0  | 0  | 0  | 0   | 0  | 0  | 0  |
| 10 | 5  | 9  | 0  | 0  | 0   | 1  | 2  | 1  |
| 0  | 0  | 0  | 0  | 0  | 0   | 0  | 0  | 0  |
| 1  | 0  | 1  | 3  | 0  | 0   | 0  | 0  | 0  |
| 0  | 0  | 0  | 0  | 0  | 0   | 0  | 0  | 0  |
| 1  | 1  | 0  | 0  | 0  | 0   | 0  | 0  | 0  |
| 1  | 5  | 1  | 0  | 0  | 3   | 0  | 0  | 2  |
| 0  | 0  | 0  | 0  | 0  | 0   | 0  | 0  | 0  |
| 0  | 0  | 0  | 0  | 0  | 0   | 0  | 0  | 0  |
| 0  | 0  | 0  | 0  | 0  | 0   | 0  | 0  | 0  |
| 0  | 0  | 0  | 0  | 0  | 2   | 0  | 0  | 0  |
| 7  | 5  | 9  | 0  | 0  | 16  | 1  | 2  | 2  |
| 0  | 0  | 0  | 0  | 0  | 0   | 0  | 0  | 0  |
| 0  | 0  | 0  | 0  | 3  | 9   | 6  | 0  | 0  |
| 0  | 0  | 0  | 0  | 0  | 0   | 0  | 0  | 0  |
| 24 | 50 | 24 | 14 | 43 | 47  | 6  | 12 | 36 |
| 0  | 1  | 0  | 1  | 0  | 0   | 1  | 0  | 1  |
| 0  | 0  | 0  | 0  | 0  | 0   | 0  | 0  | 0  |
| 8  | 0  | 1  | 1  | 1  | 1   | 9  | 8  | 13 |
| 0  | 0  | 0  | 0  | 0  | 0   | 0  | 0  | 0  |
| 0  | 0  | 0  | 0  | 0  | 0   | 0  | 0  | 0  |
| 4  | 0  | 6  | 0  | 1  | 11  | 0  | 0  | 3  |





|     |    |   |    |    |    |    |    |     |
|-----|----|---|----|----|----|----|----|-----|
| 0   | 0  | 0 | 0  | 0  | 0  | 0  | 0  | 0   |
| 0   | 0  | 0 | 0  | 0  | 0  | 0  | 0  | 0   |
| 0   | 0  | 0 | 0  | 0  | 0  | 0  | 0  | 0   |
| 4   | 2  | 0 | 1  | 1  | 14 | 12 | 1  | 1   |
| 1   | 0  | 0 | 0  | 0  | 0  | 0  | 0  | 0   |
| 1   | 0  | 0 | 0  | 0  | 0  | 0  | 0  | 0   |
| 47  | 1  | 0 | 31 | 5  | 0  | 0  | 1  | 8   |
| 104 | 3  | 1 | 0  | 3  | 1  | 0  | 9  | 22  |
| 0   | 0  | 0 | 0  | 0  | 0  | 0  | 0  | 0   |
| 0   | 0  | 0 | 0  | 0  | 0  | 0  | 0  | 0   |
| 0   | 0  | 0 | 0  | 0  | 0  | 0  | 0  | 0   |
| 0   | 0  | 0 | 0  | 0  | 0  | 0  | 0  | 0   |
| 0   | 0  | 0 | 0  | 0  | 0  | 0  | 0  | 0   |
| 0   | 0  | 0 | 0  | 0  | 0  | 0  | 0  | 0   |
| 0   | 0  | 0 | 0  | 0  | 0  | 0  | 0  | 0   |
| 0   | 0  | 0 | 0  | 0  | 0  | 0  | 0  | 0   |
| 0   | 0  | 0 | 0  | 0  | 0  | 0  | 0  | 0   |
| 54  | 7  | 2 | 0  | 3  | 0  | 1  | 1  | 28  |
| 0   | 0  | 0 | 0  | 0  | 0  | 0  | 0  | 0   |
| 67  | 0  | 0 | 0  | 2  | 0  | 0  | 3  | 4   |
| 43  | 23 | 8 | 0  | 16 | 1  | 1  | 6  | 137 |
| 0   | 2  | 0 | 0  | 0  | 0  | 0  | 0  | 0   |
| 12  | 0  | 0 | 0  | 7  | 0  | 0  | 0  | 4   |
| 0   | 0  | 0 | 0  | 0  | 0  | 0  | 0  | 0   |
| 0   | 0  | 0 | 0  | 0  | 0  | 0  | 0  | 0   |
| 0   | 0  | 0 | 0  | 0  | 0  | 0  | 0  | 0   |
| 0   | 1  | 0 | 0  | 1  | 0  | 0  | 0  | 9   |
| 0   | 0  | 0 | 0  | 0  | 0  | 0  | 1  | 0   |
| 0   | 0  | 0 | 0  | 0  | 0  | 0  | 0  | 0   |
| 0   | 0  | 0 | 0  | 0  | 0  | 0  | 0  | 0   |
| 0   | 0  | 0 | 0  | 0  | 0  | 0  | 0  | 0   |
| 0   | 0  | 0 | 0  | 0  | 0  | 0  | 0  | 1   |
| 0   | 0  | 0 | 0  | 0  | 0  | 0  | 0  | 0   |
| 0   | 0  | 0 | 0  | 0  | 0  | 0  | 0  | 0   |
| 0   | 0  | 0 | 0  | 0  | 0  | 0  | 0  | 0   |
| 0   | 0  | 0 | 0  | 0  | 0  | 0  | 0  | 0   |
| 0   | 0  | 0 | 0  | 0  | 0  | 1  | 0  | 0   |
| 0   | 0  | 0 | 0  | 0  | 0  | 0  | 0  | 1   |
| 53  | 0  | 0 | 0  | 0  | 0  | 0  | 1  | 0   |
| 0   | 0  | 0 | 0  | 0  | 0  | 0  | 0  | 0   |
| 0   | 0  | 0 | 0  | 0  | 0  | 0  | 0  | 1   |
| 0   | 0  | 0 | 0  | 0  | 0  | 0  | 0  | 0   |
| 29  | 12 | 2 | 11 | 20 | 3  | 0  | 22 | 25  |
| 0   | 0  | 0 | 0  | 0  | 0  | 0  | 0  | 0   |
| 0   | 0  | 0 | 0  | 0  | 0  | 0  | 0  | 0   |
| 7   | 1  | 0 | 3  | 1  | 9  | 1  | 0  | 2   |
| 0   | 0  | 0 | 0  | 0  | 0  | 0  | 0  | 0   |
| 0   | 0  | 0 | 0  | 0  | 0  | 0  | 0  | 0   |
| 0   | 0  | 0 | 0  | 2  | 0  | 0  | 0  | 1   |

|      |     |   |      |    |     |    |     |    |
|------|-----|---|------|----|-----|----|-----|----|
| 0    | 0   | 0 | 0    | 0  | 0   | 0  | 0   | 0  |
| 3    | 0   | 0 | 0    | 3  | 2   | 1  | 1   | 3  |
| 29   | 7   | 0 | 2    | 4  | 2   | 0  | 3   | 3  |
| 0    | 0   | 0 | 0    | 0  | 0   | 0  | 0   | 0  |
| 0    | 0   | 0 | 0    | 1  | 0   | 0  | 0   | 1  |
| 1251 | 122 | 1 | 1260 | 72 | 233 | 63 | 110 | 6  |
| 0    | 0   | 0 | 0    | 0  | 0   | 0  | 0   | 0  |
| 0    | 0   | 0 | 0    | 0  | 0   | 0  | 0   | 0  |
| 0    | 0   | 0 | 0    | 0  | 0   | 0  | 0   | 0  |
| 0    | 0   | 0 | 0    | 0  | 0   | 0  | 0   | 0  |
| 0    | 0   | 0 | 0    | 0  | 0   | 0  | 0   | 0  |
| 0    | 0   | 0 | 0    | 0  | 0   | 0  | 0   | 0  |
| 0    | 0   | 1 | 0    | 0  | 0   | 0  | 0   | 0  |
| 0    | 0   | 0 | 0    | 0  | 0   | 0  | 0   | 0  |
| 0    | 0   | 0 | 0    | 0  | 0   | 0  | 0   | 0  |
| 0    | 0   | 0 | 0    | 0  | 0   | 0  | 0   | 0  |
| 0    | 0   | 0 | 0    | 0  | 0   | 0  | 0   | 0  |
| 34   | 1   | 1 | 1    | 8  | 10  | 0  | 58  | 13 |
| 0    | 0   | 0 | 0    | 0  | 0   | 0  | 0   | 0  |
| 1    | 0   | 0 | 6    | 0  | 0   | 11 | 5   | 0  |
| 2    | 24  | 1 | 1    | 0  | 2   | 5  | 12  | 3  |
| 0    | 0   | 0 | 0    | 0  | 0   | 0  | 0   | 2  |
| 4    | 0   | 0 | 0    | 0  | 0   | 0  | 1   | 0  |
| 0    | 0   | 0 | 0    | 0  | 0   | 0  | 0   | 0  |
| 0    | 0   | 0 | 0    | 0  | 0   | 0  | 0   | 0  |
| 0    | 1   | 0 | 0    | 0  | 0   | 0  | 1   | 8  |
| 19   | 2   | 1 | 6    | 8  | 3   | 0  | 19  | 2  |
| 0    | 0   | 0 | 1    | 0  | 0   | 0  | 0   | 2  |
| 1    | 0   | 0 | 0    | 0  | 0   | 0  | 0   | 0  |

| CP38 | CP39 | CP4 | CP40 | CP5 | CP6 | CP7 | CP8 | CP9 |     |
|------|------|-----|------|-----|-----|-----|-----|-----|-----|
|      | 0    | 0   | 0    | 0   | 8   | 0   | 0   | 0   | 0   |
|      | 0    | 1   | 0    | 0   | 15  | 0   | 0   | 0   | 0   |
|      | 18   | 2   | 1    | 4   | 64  | 2   | 12  | 4   | 2   |
|      | 42   | 0   | 1    | 34  | 29  | 363 | 17  | 52  | 3   |
|      | 0    | 0   | 0    | 0   | 0   | 0   | 0   | 0   | 0   |
|      | 0    | 0   | 0    | 0   | 0   | 0   | 0   | 0   | 0   |
|      | 0    | 0   | 0    | 0   | 0   | 0   | 0   | 0   | 0   |
|      | 0    | 0   | 0    | 0   | 5   | 0   | 0   | 0   | 0   |
|      | 2    | 0   | 0    | 0   | 0   | 0   | 0   | 0   | 0   |
|      | 0    | 0   | 0    | 0   | 0   | 0   | 0   | 0   | 0   |
|      | 0    | 0   | 0    | 0   | 2   | 0   | 0   | 0   | 0   |
|      | 51   | 7   | 0    | 0   | 0   | 24  | 64  | 32  | 0   |
|      | 35   | 21  | 93   | 4   | 219 | 12  | 49  | 98  | 244 |
|      | 0    | 0   | 0    | 0   | 2   | 0   | 0   | 0   | 0   |
|      | 0    | 0   | 0    | 0   | 0   | 0   | 0   | 0   | 0   |
|      | 0    | 7   | 0    | 0   | 258 | 0   | 0   | 0   | 0   |
|      | 0    | 0   | 0    | 0   | 153 | 0   | 0   | 0   | 0   |
|      | 0    | 0   | 0    | 0   | 0   | 0   | 1   | 1   | 2   |
|      | 25   | 14  | 19   | 35  | 37  | 80  | 6   | 11  | 9   |
|      | 0    | 6   | 0    | 1   | 0   | 1   | 0   | 0   | 1   |
|      | 0    | 0   | 0    | 0   | 0   | 0   | 0   | 0   | 0   |
|      | 1    | 0   | 0    | 5   | 0   | 0   | 10  | 0   | 0   |
|      | 24   | 3   | 0    | 0   | 0   | 0   | 4   | 282 | 8   |
|      | 2    | 4   | 1    | 0   | 0   | 0   | 0   | 0   | 0   |
|      | 0    | 0   | 0    | 0   | 1   | 0   | 0   | 0   | 0   |
|      | 0    | 0   | 0    | 0   | 8   | 0   | 0   | 0   | 0   |
|      | 0    | 0   | 0    | 0   | 0   | 0   | 0   | 0   | 0   |
|      | 0    | 0   | 0    | 0   | 0   | 0   | 0   | 0   | 0   |
|      | 1    | 0   | 1    | 12  | 0   | 7   | 5   | 10  | 25  |
|      | 0    | 0   | 0    | 0   | 1   | 0   | 0   | 0   | 0   |
|      | 0    | 0   | 0    | 2   | 1   | 0   | 0   | 0   | 0   |
|      | 0    | 0   | 0    | 0   | 0   | 0   | 1   | 0   | 0   |
|      | 0    | 0   | 0    | 0   | 72  | 0   | 0   | 0   | 0   |
|      | 5    | 1   | 15   | 0   | 0   | 0   | 4   | 1   | 6   |
|      | 0    | 0   | 0    | 0   | 3   | 0   | 0   | 0   | 0   |
|      | 0    | 0   | 0    | 0   | 1   | 0   | 0   | 0   | 0   |
|      | 0    | 0   | 0    | 0   | 0   | 0   | 0   | 0   | 0   |
|      | 0    | 0   | 0    | 0   | 0   | 0   | 0   | 0   | 0   |
|      | 1    | 0   | 0    | 1   | 16  | 0   | 2   | 0   | 1   |
|      | 0    | 0   | 0    | 0   | 0   | 0   | 0   | 0   | 0   |
|      | 0    | 0   | 0    | 0   | 9   | 0   | 0   | 0   | 0   |
|      | 0    | 0   | 0    | 0   | 1   | 0   | 0   | 0   | 0   |
|      | 39   | 82  | 1    | 3   | 129 | 1   | 34  | 103 | 14  |
|      | 0    | 0   | 0    | 0   | 97  | 0   | 2   | 0   | 0   |
|      | 0    | 0   | 0    | 0   | 9   | 5   | 0   | 2   | 2   |
|      | 0    | 0   | 0    | 0   | 0   | 0   | 0   | 0   | 0   |
|      | 3    | 0   | 0    | 0   | 0   | 0   | 0   | 8   | 0   |



|    |     |    |     |     |   |     |    |    |
|----|-----|----|-----|-----|---|-----|----|----|
| 0  | 0   | 0  | 0   | 1   | 0 | 0   | 0  | 0  |
| 0  | 0   | 0  | 0   | 11  | 0 | 0   | 0  | 0  |
| 0  | 0   | 0  | 0   | 0   | 0 | 0   | 0  | 0  |
| 8  | 2   | 2  | 2   | 74  | 8 | 2   | 0  | 0  |
| 0  | 0   | 0  | 0   | 235 | 3 | 1   | 2  | 2  |
| 0  | 0   | 1  | 2   | 0   | 3 | 0   | 0  | 1  |
| 0  | 5   | 11 | 5   | 12  | 6 | 8   | 21 | 3  |
| 13 | 4   | 18 | 135 | 2   | 3 | 451 | 2  | 49 |
| 0  | 0   | 0  | 0   | 3   | 0 | 0   | 0  | 0  |
| 0  | 0   | 0  | 0   | 12  | 0 | 0   | 0  | 0  |
| 0  | 0   | 0  | 0   | 0   | 0 | 0   | 0  | 0  |
| 0  | 0   | 0  | 0   | 1   | 0 | 0   | 0  | 0  |
| 0  | 0   | 0  | 0   | 19  | 0 | 0   | 0  | 0  |
| 0  | 0   | 0  | 0   | 4   | 0 | 0   | 0  | 0  |
| 0  | 0   | 0  | 0   | 0   | 0 | 0   | 1  | 0  |
| 0  | 0   | 0  | 0   | 0   | 0 | 0   | 0  | 0  |
| 10 | 45  | 10 | 4   | 0   | 4 | 0   | 0  | 27 |
| 0  | 0   | 0  | 0   | 3   | 0 | 0   | 0  | 0  |
| 14 | 39  | 0  | 0   | 0   | 1 | 0   | 36 | 6  |
| 22 | 346 | 6  | 7   | 28  | 6 | 1   | 8  | 4  |
| 0  | 0   | 0  | 0   | 0   | 0 | 0   | 0  | 0  |
| 3  | 8   | 5  | 4   | 0   | 0 | 108 | 3  | 3  |
| 0  | 0   | 0  | 0   | 2   | 0 | 0   | 0  | 0  |
| 0  | 0   | 0  | 0   | 5   | 0 | 0   | 0  | 1  |
| 0  | 0   | 0  | 0   | 0   | 0 | 0   | 1  | 0  |
| 3  | 4   | 0  | 0   | 1   | 0 | 2   | 2  | 0  |
| 0  | 0   | 0  | 0   | 0   | 0 | 0   | 0  | 0  |
| 0  | 0   | 0  | 0   | 0   | 0 | 0   | 0  | 0  |
| 0  | 0   | 0  | 0   | 3   | 0 | 0   | 0  | 0  |
| 0  | 3   | 0  | 3   | 0   | 0 | 0   | 0  | 1  |
| 0  | 0   | 0  | 0   | 0   | 0 | 0   | 0  | 0  |
| 1  | 0   | 2  | 0   | 1   | 0 | 1   | 0  | 0  |
| 0  | 0   | 0  | 0   | 0   | 0 | 0   | 0  | 0  |
| 0  | 0   | 0  | 1   | 0   | 0 | 0   | 0  | 0  |
| 2  | 2   | 2  | 0   | 5   | 1 | 0   | 0  | 0  |
| 0  | 0   | 0  | 0   | 1   | 0 | 0   | 0  | 0  |
| 0  | 0   | 0  | 0   | 1   | 2 | 0   | 0  | 0  |
| 0  | 0   | 0  | 0   | 0   | 0 | 0   | 0  | 0  |
| 0  | 0   | 0  | 0   | 0   | 0 | 0   | 1  | 0  |
| 5  | 1   | 10 | 13  | 0   | 1 | 0   | 0  | 23 |
| 0  | 0   | 0  | 0   | 1   | 0 | 0   | 0  | 0  |
| 1  | 0   | 0  | 0   | 1   | 1 | 0   | 0  | 0  |
| 0  | 0   | 0  | 0   | 0   | 0 | 0   | 0  | 0  |
| 19 | 55  | 10 | 51  | 10  | 5 | 83  | 34 | 32 |
| 0  | 0   | 0  | 0   | 0   | 0 | 0   | 0  | 0  |
| 0  | 0   | 0  | 0   | 2   | 0 | 0   | 0  | 0  |
| 6  | 53  | 1  | 0   | 3   | 0 | 1   | 0  | 1  |
| 0  | 0   | 0  | 0   | 1   | 0 | 0   | 0  | 0  |
| 0  | 0   | 0  | 0   | 1   | 0 | 0   | 0  | 0  |
| 0  | 3   | 0  | 1   | 0   | 0 | 0   | 0  | 3  |



**Total OTUs**

11  
41  
329  
2072  
0  
2  
3  
7  
2  
3  
2  
926  
3177  
2  
1  
310  
153  
70  
1224  
121  
0  
86  
967  
87  
1  
8  
63  
0  
132  
1  
3  
1  
72  
94  
3  
1  
1  
1  
46  
1  
9  
1  
1717  
115  
141  
2  
20

1  
11  
0  
338  
298  
10  
334  
2420  
3  
12  
20  
1  
19  
4  
2  
2  
491  
6  
539  
1491  
3  
357  
2  
6  
1  
56  
16  
1  
3  
86  
0  
11  
0  
10  
36  
1  
3  
1  
4  
264  
1  
35  
0  
1053  
4  
2  
150  
1  
1  
69

1  
74  
760  
9  
24  
10557  
8  
3  
1  
4  
22  
2  
91  
2  
8  
3  
197  
8  
286  
447  
3  
53  
5  
4  
27  
324  
0  
0
